# Supplementary material for: First real-world evidence from the Emilia-Romagna region suggests tamoxifen protects breast cancer patients from COVID-19
Source: Springer Nature journal article supplement (doi:10.1038/s41598-025-22463-8), 2025-11-05
Supplement: MOESM1 [file 41598_2025_22463_MOESM1_ESM.xlsx]

## Sheet: Supp. Table S1
Supp. Table S1	Patient ID	Sex	Age	Metastatic	Previous_treatment	Group	CCI	Covid_hospitalization	Covid_death
Table S1. Database containing the relevant information used in the analyses from breast cancer patients in the Emilia-Romagna region from January 1st to December 31st, 2020. Sex: F "Female", M "Male", Age: age at treatment start, Charlson Comorbidity Index (CCI): "Low CCI", "High CCI", presence of metastasis: 0 "No" 1 "Yes", previous breast cancer treatment: 0 "No" 1 "Yes", treatment group: "anti…	39	F	77	0	1	aromatase inhibitor	low CCI	0	0
	42	F	46	0	1	tamoxifene	low CCI	0	0
	69	F	73	0	1	aromatase inhibitor	low CCI	0	0
	114	F	61	0	1	aromatase inhibitor	low CCI	0	0
	272	F	72	0	1	aromatase inhibitor	low CCI	0	0
	701	F	78	0	1	aromatase inhibitor	high CCI	0	0
	1157	F	56	0	1	aromatase inhibitor	low CCI	0	0
	1164	F	63	0	1	aromatase inhibitor	low CCI	0	0
	1346	F	62	1	0	aromatase inhibitor	high CCI	0	0
	1559	F	55	0	1	aromatase inhibitor	low CCI	0	0
	2612	F	55	0	1	tamoxifene	low CCI	0	0
	2766	F	81	0	1	aromatase inhibitor	high CCI	0	0
	2864	F	81	0	1	aromatase inhibitor	high CCI	0	0
	2905	F	70	0	1	aromatase inhibitor	low CCI	0	0
	2953	F	98	0	1	aromatase inhibitor	high CCI	0	0
	3039	F	60	0	0	aromatase inhibitor	high CCI	0	0
	3102	F	64	0	1	aromatase inhibitor	low CCI	0	0
	3159	F	52	0	1	tamoxifene	low CCI	0	0
	3481	F	51	0	1	aromatase inhibitor	low CCI	0	0
	3516	F	79	0	0	aromatase inhibitor	high CCI	0	0
	3603	F	75	1	1	aromatase inhibitor	high CCI	0	0
	3768	F	71	0	0	aromatase inhibitor	high CCI	0	0
	3796	F	51	0	1	aromatase inhibitor	low CCI	0	0
	3945	F	50	0	1	tamoxifene	low CCI	0	0
	4040	F	54	0	1	aromatase inhibitor	low CCI	0	0
	4166	F	57	0	1	tamoxifene	low CCI	0	0
	4312	F	75	0	1	aromatase inhibitor	high CCI	0	0
	4412	F	84	0	1	aromatase inhibitor	high CCI	0	0
	4703	F	75	1	1	aromatase inhibitor	high CCI	0	0
	4758	F	73	0	1	aromatase inhibitor	low CCI	0	0
	5336	F	54	0	1	aromatase inhibitor	low CCI	0	0
	5377	F	52	0	1	tamoxifene	low CCI	0	0
	5780	F	84	0	1	aromatase inhibitor	high CCI	0	0
	6637	F	67	0	1	aromatase inhibitor	low CCI	0	0
	6654	F	79	0	1	aromatase inhibitor	high CCI	0	0
	7210	F	67	0	1	aromatase inhibitor	low CCI	0	0
	7761	F	45	0	0	aromatase inhibitor	low CCI	0	0
	7831	F	33	0	1	aromatase inhibitor	NA	0	0
	7987	F	54	0	1	tamoxifene	low CCI	0	0
	8124	F	78	0	1	aromatase inhibitor	low CCI	0	0
	8593	F	50	0	1	aromatase inhibitor	low CCI	0	0
	8806	F	45	0	0	tamoxifene	low CCI	0	0
	8932	F	44	0	1	tamoxifene	low CCI	0	0
	9226	F	45	1	1	aromatase inhibitor	high CCI	0	0
	9662	F	73	0	1	aromatase inhibitor	high CCI	0	0
	9846	F	73	0	1	aromatase inhibitor	high CCI	0	0
	9977	F	82	0	1	aromatase inhibitor	high CCI	0	0
	9997	F	87	0	1	aromatase inhibitor	high CCI	0	0
	10043	F	70	0	1	aromatase inhibitor	high CCI	0	0
	10163	F	51	0	1	aromatase inhibitor	low CCI	0	0
	10410	F	60	0	1	tamoxifene	low CCI	0	0
	11222	F	77	0	0	anti-Her2	high CCI	0	0
	11258	F	73	0	1	aromatase inhibitor	high CCI	0	0
	11420	F	49	0	1	tamoxifene	NA	0	0
	12773	F	79	0	1	aromatase inhibitor	low CCI	0	0
	12847	F	72	0	1	aromatase inhibitor	low CCI	0	0
	12976	F	72	0	1	aromatase inhibitor	low CCI	0	0
	13290	F	77	0	1	aromatase inhibitor	low CCI	0	0
	13484	F	55	0	1	tamoxifene	low CCI	0	0
	13747	F	88	0	1	aromatase inhibitor	high CCI	0	0
	13953	F	58	0	1	aromatase inhibitor	low CCI	0	0
	14284	F	74	1	0	aromatase inhibitor	high CCI	0	0
	14665	F	78	1	0	tamoxifene	high CCI	0	0
	14674	F	71	0	1	aromatase inhibitor	high CCI	0	0
	14691	F	57	0	1	aromatase inhibitor	low CCI	0	0
	14853	F	44	0	1	aromatase inhibitor	NA	0	0
	14888	F	80	1	1	aromatase inhibitor	high CCI	0	0
	14911	F	78	0	1	aromatase inhibitor	low CCI	0	0
	14931	F	65	0	1	aromatase inhibitor	high CCI	0	0
	15712	F	86	0	0	aromatase inhibitor	high CCI	0	0
	16441	M	78	0	0	aromatase inhibitor	low CCI	0	0
	16442	F	78	0	0	aromatase inhibitor	low CCI	0	0
	16609	F	65	0	1	aromatase inhibitor	low CCI	0	0
	17037	F	58	0	0	aromatase inhibitor	low CCI	0	0
	17156	F	60	0	1	aromatase inhibitor	low CCI	0	0
	17419	F	40	0	1	anti-Her2	low CCI	0	0
	17552	F	50	0	1	aromatase inhibitor	low CCI	0	0
	17736	F	50	1	0	aromatase inhibitor	high CCI	0	0
	18003	F	84	0	1	aromatase inhibitor	high CCI	0	0
	18220	F	55	0	0	aromatase inhibitor	low CCI	0	0
	18266	F	78	0	0	aromatase inhibitor	low CCI	1	1
	18299	F	77	0	1	aromatase inhibitor	low CCI	0	0
	18371	F	78	0	1	aromatase inhibitor	low CCI	0	0
	18672	F	51	0	1	tamoxifene	low CCI	0	0
	18716	F	70	0	1	aromatase inhibitor	high CCI	0	0
	18847	F	78	0	1	tamoxifene	high CCI	0	0
	18959	F	56	0	1	aromatase inhibitor	low CCI	0	0
	19137	F	58	0	1	aromatase inhibitor	low CCI	0	0
	19988	F	50	0	1	tamoxifene	low CCI	0	0
	20566	F	66	0	1	aromatase inhibitor	high CCI	0	0
	20593	F	85	1	0	aromatase inhibitor	high CCI	0	0
	20622	F	74	0	1	aromatase inhibitor	high CCI	0	0
	20642	F	71	0	0	aromatase inhibitor	high CCI	0	0
	20868	F	60	0	1	aromatase inhibitor	low CCI	0	0
	21712	F	59	1	1	aromatase inhibitor	high CCI	0	0
	21721	F	54	0	1	aromatase inhibitor	low CCI	0	0
	22145	F	70	0	1	aromatase inhibitor	low CCI	0	0
	22153	F	67	0	1	aromatase inhibitor	low CCI	0	0
	22313	F	84	0	1	aromatase inhibitor	high CCI	0	0
	22364	F	89	0	1	tamoxifene	high CCI	0	0
	22908	F	60	1	1	aromatase inhibitor	high CCI	0	0
	22948	F	53	0	1	aromatase inhibitor	low CCI	0	0
	23059	F	62	0	1	aromatase inhibitor	low CCI	0	0
	23256	F	91	1	1	aromatase inhibitor	high CCI	0	0
	24337	F	62	0	1	tamoxifene	high CCI	0	0
	24348	F	59	0	1	aromatase inhibitor	low CCI	0	0
	24349	F	59	0	1	aromatase inhibitor	low CCI	0	0
	24358	F	57	0	1	tamoxifene	low CCI	0	0
	24916	F	63	0	1	aromatase inhibitor	high CCI	0	0
	24920	F	60	0	1	aromatase inhibitor	low CCI	0	0
	25140	F	72	0	1	anti-Her2	high CCI	0	0
	25251	F	88	0	1	tamoxifene	high CCI	0	0
	25264	F	81	0	1	aromatase inhibitor	high CCI	0	0
	25280	F	73	0	0	aromatase inhibitor	high CCI	0	0
	25492	F	80	0	1	aromatase inhibitor	high CCI	0	0
	25778	F	55	0	1	tamoxifene	low CCI	0	0
	25899	F	44	0	1	tamoxifene	low CCI	0	0
	25966	F	84	0	0	aromatase inhibitor	high CCI	0	0
	26285	F	49	0	1	tamoxifene	NA	0	0
	26328	F	65	0	1	aromatase inhibitor	high CCI	0	0
	26366	F	51	0	1	tamoxifene	low CCI	0	0
	26518	F	53	0	0	tamoxifene	low CCI	0	0
	26580	F	46	0	1	aromatase inhibitor	low CCI	0	0
	26807	F	56	0	1	aromatase inhibitor	low CCI	0	0
	26846	F	48	0	1	tamoxifene	NA	0	0
	28135	F	69	0	0	aromatase inhibitor	low CCI	0	0
	28144	F	65	0	1	aromatase inhibitor	high CCI	0	0
	28426	F	66	0	1	aromatase inhibitor	low CCI	0	0
	28652	F	68	0	1	aromatase inhibitor	high CCI	0	0
	28660	F	60	0	1	aromatase inhibitor	low CCI	0	0
	28703	F	74	0	1	aromatase inhibitor	high CCI	0	0
	28837	F	47	1	1	tamoxifene	high CCI	0	0
	29351	F	49	0	1	tamoxifene	low CCI	0	0
	29422	F	57	0	1	tamoxifene	low CCI	0	0
	29939	F	76	0	0	aromatase inhibitor	high CCI	0	0
	30154	F	54	0	1	aromatase inhibitor	low CCI	0	0
	30243	F	57	0	0	aromatase inhibitor	low CCI	0	0
	30254	F	51	0	1	tamoxifene	low CCI	0	0
	30578	F	74	0	1	aromatase inhibitor	high CCI	0	0
	30869	F	77	0	1	aromatase inhibitor	low CCI	0	0
	30892	F	70	0	1	aromatase inhibitor	high CCI	0	0
	30929	F	74	0	1	aromatase inhibitor	high CCI	0	0
	30958	F	48	0	1	tamoxifene	NA	0	0
	30984	F	62	0	1	tamoxifene	high CCI	0	0
	31023	F	69	0	1	aromatase inhibitor	high CCI	0	0
	31069	F	68	0	1	tamoxifene	low CCI	0	0
	31108	F	71	0	1	aromatase inhibitor	low CCI	0	0
	31414	M	77	0	0	tamoxifene	high CCI	0	0
	31805	F	73	0	1	tamoxifene	high CCI	0	0
	31911	M	71	0	1	tamoxifene	low CCI	0	0
	31930	F	49	0	1	aromatase inhibitor	low CCI	0	0
	32607	F	49	1	1	tamoxifene	high CCI	0	0
	33020	F	82	0	0	aromatase inhibitor	high CCI	0	0
	33155	F	65	0	1	aromatase inhibitor	high CCI	0	0
	33673	F	90	0	0	aromatase inhibitor	high CCI	1	0
	33932	F	52	0	1	aromatase inhibitor	low CCI	0	0
	34041	F	69	0	1	aromatase inhibitor	low CCI	0	0
	34170	F	53	0	1	tamoxifene	low CCI	0	0
	34173	F	42	0	1	tamoxifene	NA	0	0
	35388	F	73	0	1	aromatase inhibitor	low CCI	0	0
	35589	F	89	0	1	aromatase inhibitor	high CCI	0	0
	35765	F	52	0	1	aromatase inhibitor	low CCI	0	0
	35980	F	73	0	0	aromatase inhibitor	high CCI	0	0
	35983	F	40	1	1	aromatase inhibitor	high CCI	0	0
	36037	F	76	0	1	aromatase inhibitor	low CCI	0	0
	37569	F	45	0	1	tamoxifene	low CCI	0	0
	37781	F	67	0	1	aromatase inhibitor	high CCI	0	0
	37783	F	62	0	1	aromatase inhibitor	low CCI	0	0
	37845	F	81	0	1	aromatase inhibitor	high CCI	0	0
	38365	F	69	0	1	aromatase inhibitor	low CCI	0	0
	38370	F	54	0	1	aromatase inhibitor	low CCI	0	0
	38524	F	46	0	1	tamoxifene	NA	0	0
	38608	F	69	0	1	aromatase inhibitor	high CCI	0	0
	38926	F	52	0	1	tamoxifene	low CCI	0	0
	39365	F	78	0	1	aromatase inhibitor	low CCI	0	0
	39428	F	88	0	1	fulvestrant	high CCI	0	0
	40304	F	68	0	1	aromatase inhibitor	low CCI	0	0
	40400	F	86	0	1	aromatase inhibitor	high CCI	0	0
	40474	F	61	0	1	aromatase inhibitor	low CCI	0	0
	40595	F	77	0	1	aromatase inhibitor	low CCI	0	0
	40612	F	58	0	1	tamoxifene	low CCI	0	0
	40645	F	86	0	1	aromatase inhibitor	high CCI	0	0
	40659	F	59	0	1	aromatase inhibitor	low CCI	0	0
	40866	F	46	0	1	aromatase inhibitor	NA	0	0
	40949	F	92	0	1	aromatase inhibitor	high CCI	0	0
	41547	F	87	0	1	aromatase inhibitor	high CCI	0	0
	41668	F	74	1	1	aromatase inhibitor	high CCI	0	0
	41701	F	68	0	1	tamoxifene	low CCI	0	0
	41918	F	68	0	1	aromatase inhibitor	low CCI	0	0
	42124	F	76	0	0	aromatase inhibitor	high CCI	0	0
	42213	F	67	0	1	aromatase inhibitor	low CCI	0	0
	42256	F	58	0	1	aromatase inhibitor	low CCI	0	0
	42368	F	70	0	1	aromatase inhibitor	high CCI	0	0
	42483	F	61	0	1	aromatase inhibitor	high CCI	0	0
	42663	F	53	1	1	aromatase inhibitor	high CCI	0	0
	42701	F	59	0	1	aromatase inhibitor	low CCI	0	0
	43146	F	75	0	1	aromatase inhibitor	low CCI	0	0
	43242	F	81	0	1	aromatase inhibitor	high CCI	0	0
	43260	F	74	0	1	aromatase inhibitor	low CCI	0	0
	43324	F	74	1	1	aromatase inhibitor	high CCI	0	0
	43437	F	72	0	1	aromatase inhibitor	low CCI	0	0
	43438	F	70	0	1	aromatase inhibitor	low CCI	0	0
	43673	F	51	0	1	aromatase inhibitor	low CCI	0	0
	44021	F	66	0	1	aromatase inhibitor	high CCI	0	0
	44049	F	61	0	1	aromatase inhibitor	low CCI	0	0
	44231	F	77	0	1	aromatase inhibitor	low CCI	0	0
	44657	F	72	0	1	aromatase inhibitor	low CCI	0	0
	44897	F	76	0	1	aromatase inhibitor	high CCI	0	0
	45147	F	52	0	1	tamoxifene	low CCI	0	0
	45221	F	45	0	0	tamoxifene	low CCI	0	0
	45225	F	64	0	1	aromatase inhibitor	low CCI	0	0
	45426	F	71	0	1	aromatase inhibitor	low CCI	0	0
	45643	F	63	1	1	aromatase inhibitor	high CCI	0	0
	45726	F	47	1	0	aromatase inhibitor	high CCI	0	0
	45791	F	77	0	1	aromatase inhibitor	low CCI	0	0
	45961	F	68	1	1	aromatase inhibitor	high CCI	0	0
	46347	F	93	0	1	aromatase inhibitor	high CCI	0	0
	46449	F	56	0	0	aromatase inhibitor	low CCI	0	0
	46460	F	78	1	1	aromatase inhibitor	high CCI	0	0
	46671	F	75	0	1	aromatase inhibitor	low CCI	0	0
	46736	F	68	0	1	anti-Her2	high CCI	0	0
	46986	F	44	0	1	tamoxifene	NA	0	0
	47031	F	81	0	1	aromatase inhibitor	high CCI	0	0
	47117	F	49	0	1	tamoxifene	low CCI	0	0
	47179	F	70	0	1	aromatase inhibitor	low CCI	0	0
	47296	F	71	0	1	aromatase inhibitor	low CCI	0	0
	47352	M	82	0	1	anti-Her2	high CCI	0	0
	47381	F	64	0	0	aromatase inhibitor	high CCI	0	0
	47486	F	42	0	1	aromatase inhibitor	low CCI	0	0
	47520	F	65	1	1	aromatase inhibitor	high CCI	0	0
	47994	F	54	0	1	aromatase inhibitor	low CCI	0	0
	48499	F	61	1	1	aromatase inhibitor	high CCI	0	0
	48514	F	57	0	1	aromatase inhibitor	low CCI	0	0
	48568	F	79	0	1	aromatase inhibitor	high CCI	0	0
	48597	F	67	0	0	aromatase inhibitor	high CCI	0	0
	48788	F	65	0	1	aromatase inhibitor	high CCI	0	0
	49355	F	75	0	1	aromatase inhibitor	high CCI	0	0
	49394	F	60	0	1	aromatase inhibitor	low CCI	0	0
	49407	F	53	0	0	aromatase inhibitor	low CCI	0	0
	49722	F	81	0	0	aromatase inhibitor	high CCI	0	0
	49772	F	57	0	1	aromatase inhibitor	low CCI	0	0
	49779	F	93	0	0	aromatase inhibitor	high CCI	0	0
	49962	F	72	0	1	aromatase inhibitor	low CCI	0	0
	49985	F	77	0	1	aromatase inhibitor	high CCI	0	0
	50049	F	72	1	1	tamoxifene	high CCI	0	0
	50155	F	48	0	1	tamoxifene	low CCI	0	0
	50181	F	83	0	1	aromatase inhibitor	high CCI	0	0
	50210	F	71	0	1	aromatase inhibitor	high CCI	0	0
	50581	F	87	0	0	aromatase inhibitor	high CCI	0	0
	50882	F	87	1	1	aromatase inhibitor	high CCI	0	0
	51144	F	87	0	0	aromatase inhibitor	high CCI	0	0
	51229	F	53	0	1	aromatase inhibitor	low CCI	0	0
	51262	F	44	0	1	tamoxifene	low CCI	0	0
	51365	F	100	0	1	aromatase inhibitor	high CCI	0	0
	51471	F	71	0	1	aromatase inhibitor	low CCI	0	0
	51487	F	83	0	1	aromatase inhibitor	high CCI	0	0
	51638	F	63	0	1	aromatase inhibitor	low CCI	0	0
	51742	F	84	1	0	aromatase inhibitor	high CCI	0	0
	51956	F	64	0	1	aromatase inhibitor	low CCI	0	0
	52284	F	26	1	1	aromatase inhibitor	high CCI	0	0
	52649	F	72	0	1	aromatase inhibitor	high CCI	0	0
	52889	F	76	0	1	aromatase inhibitor	low CCI	0	0
	53524	F	45	0	0	tamoxifene	low CCI	0	0
	53601	F	68	1	1	tamoxifene	high CCI	0	0
	53646	F	50	0	1	tamoxifene	low CCI	0	0
	54085	F	57	0	1	tamoxifene	low CCI	0	0
	54285	F	84	0	1	aromatase inhibitor	high CCI	0	0
	54394	F	62	0	1	aromatase inhibitor	low CCI	0	0
	54506	F	53	0	1	tamoxifene	low CCI	0	0
	54936	F	43	1	1	aromatase inhibitor	high CCI	0	0
	55636	F	45	0	1	tamoxifene	NA	0	0
	55785	F	86	0	1	aromatase inhibitor	high CCI	0	0
	55982	M	53	0	1	tamoxifene	low CCI	0	0
	56081	F	84	0	1	aromatase inhibitor	high CCI	0	0
	56118	F	65	0	1	aromatase inhibitor	high CCI	0	0
	56395	F	47	1	1	tamoxifene	high CCI	0	0
	56520	F	98	0	1	aromatase inhibitor	high CCI	0	0
	56923	F	69	0	1	aromatase inhibitor	high CCI	0	0
	57637	F	69	0	1	aromatase inhibitor	high CCI	0	0
	58123	M	81	0	0	aromatase inhibitor	high CCI	0	0
	58173	F	86	1	1	aromatase inhibitor	high CCI	0	0
	58231	F	75	1	1	aromatase inhibitor	high CCI	0	0
	58296	F	59	0	1	aromatase inhibitor	low CCI	0	0
	58478	F	71	0	1	aromatase inhibitor	low CCI	0	0
	58489	F	67	0	1	aromatase inhibitor	low CCI	0	0
	58638	F	80	0	1	aromatase inhibitor	high CCI	0	0
	58730	F	61	0	1	aromatase inhibitor	low CCI	0	0
	59083	F	81	0	1	aromatase inhibitor	high CCI	0	0
	59089	F	76	0	1	aromatase inhibitor	high CCI	0	0
	59457	F	94	0	0	aromatase inhibitor	high CCI	0	0
	59509	F	74	0	1	aromatase inhibitor	low CCI	0	0
	59810	F	71	0	0	aromatase inhibitor	high CCI	0	0
	60146	F	58	0	1	aromatase inhibitor	low CCI	0	0
	60307	F	75	0	1	aromatase inhibitor	high CCI	0	0
	60334	F	70	0	1	aromatase inhibitor	low CCI	0	0
	60341	F	66	0	0	aromatase inhibitor	high CCI	0	0
	60344	F	62	1	1	tamoxifene	high CCI	0	0
	60394	F	70	0	0	tamoxifene	high CCI	0	0
	60751	F	56	0	1	aromatase inhibitor	low CCI	0	0
	60791	F	51	0	0	tamoxifene	low CCI	0	0
	60799	F	76	1	1	aromatase inhibitor	high CCI	0	0
	60801	F	68	1	1	aromatase inhibitor	high CCI	0	0
	60836	F	58	0	0	aromatase inhibitor	low CCI	0	0
	60893	F	70	0	1	aromatase inhibitor	low CCI	0	0
	60922	F	61	0	0	aromatase inhibitor	high CCI	0	0
	60932	F	57	0	1	aromatase inhibitor	low CCI	0	0
	61264	F	56	0	1	aromatase inhibitor	low CCI	0	0
	61400	F	49	0	1	aromatase inhibitor	low CCI	0	0
	61673	F	77	0	1	aromatase inhibitor	high CCI	0	0
	61838	M	51	0	0	tamoxifene	low CCI	0	0
	62426	F	65	0	1	tamoxifene	low CCI	0	0
	62544	F	82	0	1	aromatase inhibitor	high CCI	0	0
	62597	F	51	0	1	aromatase inhibitor	low CCI	0	0
	63422	F	95	0	1	tamoxifene	high CCI	0	0
	63949	F	54	0	1	tamoxifene	low CCI	0	0
	64012	F	80	0	1	aromatase inhibitor	high CCI	0	0
	64050	F	76	0	1	aromatase inhibitor	low CCI	0	0
	64387	F	58	0	1	aromatase inhibitor	low CCI	0	0
	64389	F	50	0	1	tamoxifene	low CCI	0	0
	64452	F	46	0	1	aromatase inhibitor	NA	0	0
	64587	F	70	1	1	aromatase inhibitor	high CCI	0	0
	64761	F	47	0	1	tamoxifene	low CCI	0	0
	64940	F	86	0	1	aromatase inhibitor	high CCI	0	0
	65091	F	79	0	1	aromatase inhibitor	low CCI	0	0
	65696	F	66	0	1	aromatase inhibitor	high CCI	0	0
	65737	F	78	0	1	aromatase inhibitor	low CCI	0	0
	65864	F	54	0	1	aromatase inhibitor	low CCI	0	0
	65879	F	52	0	1	tamoxifene	low CCI	0	0
	66226	F	56	1	0	aromatase inhibitor	high CCI	0	0
	66355	F	45	0	1	aromatase inhibitor	low CCI	0	0
	66737	F	40	0	1	tamoxifene	NA	0	0
	66817	F	86	0	1	aromatase inhibitor	high CCI	0	0
	66825	F	55	1	0	aromatase inhibitor	high CCI	0	0
	67038	F	64	0	1	aromatase inhibitor	low CCI	0	0
	67223	F	48	0	1	tamoxifene	NA	0	0
	67266	F	62	1	1	aromatase inhibitor	high CCI	0	0
	67782	F	55	1	1	aromatase inhibitor	high CCI	0	0
	67819	F	65	0	1	aromatase inhibitor	high CCI	0	0
	68473	M	56	0	1	aromatase inhibitor	low CCI	0	0
	68964	F	69	0	1	aromatase inhibitor	low CCI	0	0
	69153	F	64	0	1	aromatase inhibitor	low CCI	0	0
	69424	F	82	0	1	aromatase inhibitor	high CCI	0	0
	69797	F	47	0	1	aromatase inhibitor	low CCI	0	0
	71037	F	46	0	1	tamoxifene	low CCI	0	0
	71059	F	81	1	0	aromatase inhibitor	high CCI	0	0
	71272	F	82	0	1	aromatase inhibitor	high CCI	0	0
	71290	F	61	0	0	aromatase inhibitor	high CCI	0	0
	71471	F	81	0	1	aromatase inhibitor	high CCI	0	0
	71572	F	45	0	1	tamoxifene	low CCI	0	0
	71735	F	79	0	1	aromatase inhibitor	low CCI	0	0
	71814	F	74	0	0	aromatase inhibitor	high CCI	0	0
	71933	F	77	0	1	aromatase inhibitor	high CCI	0	0
	72676	F	59	0	1	aromatase inhibitor	low CCI	0	0
	72822	F	74	0	1	aromatase inhibitor	high CCI	0	0
	73206	F	72	1	1	aromatase inhibitor	high CCI	0	0
	73283	F	42	1	1	aromatase inhibitor	high CCI	0	0
	73290	F	59	0	1	aromatase inhibitor	low CCI	0	0
	73331	F	73	0	1	aromatase inhibitor	high CCI	0	0
	73450	F	74	1	1	aromatase inhibitor	high CCI	0	0
	73460	F	61	0	1	aromatase inhibitor	high CCI	0	0
	73843	F	72	0	1	aromatase inhibitor	high CCI	0	0
	74113	F	64	0	1	aromatase inhibitor	high CCI	0	0
	74281	F	77	0	1	aromatase inhibitor	high CCI	0	0
	74385	F	71	0	1	aromatase inhibitor	high CCI	0	0
	74581	F	94	0	1	aromatase inhibitor	high CCI	0	0
	74700	F	52	0	1	aromatase inhibitor	low CCI	0	0
	75306	F	91	0	1	aromatase inhibitor	high CCI	0	0
	75436	F	63	0	1	anti-Her2	low CCI	0	0
	75616	F	69	0	1	aromatase inhibitor	low CCI	0	0
	76304	F	64	0	1	aromatase inhibitor	low CCI	0	0
	76366	F	80	0	1	aromatase inhibitor	high CCI	0	0
	76402	F	60	0	1	aromatase inhibitor	low CCI	0	0
	76659	F	67	0	1	aromatase inhibitor	high CCI	0	0
	76738	F	72	0	0	aromatase inhibitor	high CCI	0	0
	76850	F	52	0	1	aromatase inhibitor	low CCI	0	0
	76856	F	73	0	1	aromatase inhibitor	high CCI	0	0
	76919	F	56	0	1	tamoxifene	low CCI	0	0
	77231	F	75	0	1	tamoxifene	high CCI	0	0
	77326	F	59	0	1	aromatase inhibitor	low CCI	0	0
	77446	F	73	0	1	aromatase inhibitor	low CCI	0	0
	77600	F	83	0	1	aromatase inhibitor	high CCI	0	0
	77863	F	70	1	1	aromatase inhibitor	high CCI	0	0
	78318	F	83	0	1	aromatase inhibitor	high CCI	0	0
	78519	F	68	0	1	aromatase inhibitor	low CCI	0	0
	78528	F	49	0	1	aromatase inhibitor	NA	0	0
	79118	F	62	0	1	aromatase inhibitor	low CCI	0	0
	79130	F	58	0	1	aromatase inhibitor	low CCI	0	0
	79313	F	64	0	0	aromatase inhibitor	low CCI	0	0
	79314	F	64	1	1	aromatase inhibitor	high CCI	0	0
	79350	F	51	0	1	aromatase inhibitor	low CCI	0	0
	79510	F	91	0	1	aromatase inhibitor	high CCI	0	0
	79518	F	78	0	1	aromatase inhibitor	high CCI	0	0
	79695	F	80	0	1	aromatase inhibitor	high CCI	0	0
	79739	F	84	0	0	aromatase inhibitor	high CCI	0	0
	79867	F	70	0	0	aromatase inhibitor	low CCI	0	0
	79891	F	64	0	1	aromatase inhibitor	low CCI	0	0
	79958	F	52	0	1	tamoxifene	low CCI	0	0
	79966	F	51	0	1	tamoxifene	low CCI	0	0
	80313	F	63	0	1	aromatase inhibitor	high CCI	0	0
	80610	F	79	0	1	fulvestrant	low CCI	0	0
	80725	F	94	0	1	aromatase inhibitor	high CCI	0	0
	80753	F	88	0	1	aromatase inhibitor	high CCI	0	0
	80763	F	86	0	1	aromatase inhibitor	high CCI	0	0
	80858	F	74	0	0	aromatase inhibitor	high CCI	0	0
	80887	F	70	0	1	aromatase inhibitor	high CCI	0	0
	80926	F	64	0	1	aromatase inhibitor	low CCI	0	0
	81013	F	46	0	1	tamoxifene	NA	0	0
	81155	F	80	0	1	aromatase inhibitor	high CCI	0	0
	81777	F	79	1	0	aromatase inhibitor	high CCI	0	0
	81959	F	70	0	1	aromatase inhibitor	high CCI	0	0
	81962	F	60	1	1	aromatase inhibitor	high CCI	0	0
	82117	F	70	0	1	aromatase inhibitor	high CCI	0	0
	82524	F	71	0	0	anti-Her2	high CCI	0	0
	82861	F	77	0	1	aromatase inhibitor	high CCI	1	0
	82880	F	73	0	1	aromatase inhibitor	low CCI	0	0
	83235	F	55	0	1	aromatase inhibitor	low CCI	0	0
	83492	F	80	0	1	aromatase inhibitor	high CCI	0	0
	83582	F	55	0	1	aromatase inhibitor	low CCI	0	0
	83666	F	57	1	1	aromatase inhibitor	high CCI	0	0
	84315	F	72	1	0	aromatase inhibitor	high CCI	0	0
	84589	F	94	0	0	fulvestrant	high CCI	0	0
	84672	F	81	1	0	aromatase inhibitor	high CCI	0	0
	84683	F	71	0	1	aromatase inhibitor	low CCI	0	0
	84831	F	50	0	0	tamoxifene	low CCI	0	0
	85212	F	65	0	1	aromatase inhibitor	high CCI	0	0
	85599	F	79	0	1	aromatase inhibitor	high CCI	0	0
	86029	F	83	0	1	aromatase inhibitor	high CCI	0	0
	86078	F	69	0	1	aromatase inhibitor	low CCI	0	0
	86081	F	67	0	1	aromatase inhibitor	low CCI	0	0
	86096	F	57	1	0	aromatase inhibitor	high CCI	0	0
	86767	F	82	0	1	aromatase inhibitor	high CCI	0	0
	86834	F	80	0	1	aromatase inhibitor	high CCI	0	0
	86842	F	75	0	1	aromatase inhibitor	high CCI	0	0
	86904	F	76	0	1	aromatase inhibitor	high CCI	0	0
	86950	F	51	0	1	tamoxifene	low CCI	0	0
	86965	F	49	0	1	aromatase inhibitor	NA	0	0
	87436	F	85	0	1	aromatase inhibitor	high CCI	0	0
	87479	F	81	0	1	aromatase inhibitor	high CCI	0	0
	87527	F	77	0	1	aromatase inhibitor	low CCI	0	0
	87602	F	68	0	0	aromatase inhibitor	high CCI	0	0
	87607	F	67	0	1	aromatase inhibitor	high CCI	0	0
	87781	F	68	0	1	aromatase inhibitor	low CCI	0	0
	88697	F	66	0	0	aromatase inhibitor	high CCI	0	0
	88702	F	77	1	0	fulvestrant	high CCI	0	0
	88746	F	49	1	1	tamoxifene	high CCI	0	0
	89029	F	77	1	1	aromatase inhibitor	high CCI	0	0
	89132	F	65	0	1	aromatase inhibitor	high CCI	0	0
	89654	F	82	0	1	aromatase inhibitor	high CCI	0	0
	89813	F	82	0	1	aromatase inhibitor	high CCI	0	0
	89851	F	72	0	1	tamoxifene	high CCI	1	0
	89953	F	83	0	0	aromatase inhibitor	high CCI	0	0
	90002	F	73	0	1	aromatase inhibitor	high CCI	0	0
	90003	F	74	0	0	tamoxifene	high CCI	0	0
	90015	F	69	0	0	aromatase inhibitor	high CCI	0	0
	90043	F	57	0	0	aromatase inhibitor	low CCI	0	0
	90090	F	71	0	1	aromatase inhibitor	high CCI	0	0
	90149	F	53	0	1	tamoxifene	low CCI	0	0
	90383	F	61	0	1	aromatase inhibitor	low CCI	0	0
	90471	F	74	0	1	aromatase inhibitor	high CCI	0	0
	90634	F	73	0	1	aromatase inhibitor	low CCI	0	0
	90728	F	82	0	1	aromatase inhibitor	high CCI	0	0
	90828	F	69	0	1	tamoxifene	low CCI	0	0
	90853	F	63	0	1	aromatase inhibitor	low CCI	0	0
	91062	M	62	0	1	tamoxifene	low CCI	0	0
	91319	F	55	0	1	aromatase inhibitor	low CCI	0	0
	91698	F	88	0	1	aromatase inhibitor	high CCI	0	0
	91713	F	69	1	1	aromatase inhibitor	high CCI	0	0
	91786	F	54	0	1	aromatase inhibitor	low CCI	0	0
	92126	F	48	0	1	tamoxifene	NA	0	0
	92343	F	69	0	1	aromatase inhibitor	low CCI	0	0
	92555	F	64	0	1	aromatase inhibitor	low CCI	0	0
	93040	F	49	0	1	tamoxifene	NA	0	0
	93981	F	75	0	1	aromatase inhibitor	low CCI	0	0
	94179	F	54	0	1	aromatase inhibitor	low CCI	0	0
	94232	F	85	0	0	aromatase inhibitor	high CCI	0	0
	94239	F	78	0	1	aromatase inhibitor	low CCI	0	0
	94285	F	85	0	1	aromatase inhibitor	high CCI	0	0
	94543	F	72	0	1	aromatase inhibitor	low CCI	0	0
	94639	F	82	0	1	aromatase inhibitor	high CCI	0	0
	95126	F	78	0	0	aromatase inhibitor	high CCI	0	0
	95140	F	76	0	1	aromatase inhibitor	low CCI	0	0
	95176	F	54	1	1	aromatase inhibitor	high CCI	0	0
	95258	F	90	1	1	aromatase inhibitor	high CCI	1	0
	95405	F	88	0	1	aromatase inhibitor	high CCI	0	0
	95637	F	69	0	1	aromatase inhibitor	high CCI	0	0
	96098	F	89	0	0	aromatase inhibitor	high CCI	1	0
	96447	F	55	0	1	aromatase inhibitor	low CCI	0	0
	96500	F	64	0	1	aromatase inhibitor	low CCI	0	0
	96865	F	69	0	1	aromatase inhibitor	high CCI	0	0
	96907	F	83	0	1	aromatase inhibitor	high CCI	0	0
	97008	F	81	0	1	aromatase inhibitor	high CCI	0	0
	97085	F	56	0	1	tamoxifene	low CCI	0	0
	97135	F	66	0	1	aromatase inhibitor	low CCI	0	0
	97245	F	84	0	1	aromatase inhibitor	high CCI	0	0
	97521	F	78	0	0	aromatase inhibitor	high CCI	0	0
	98084	F	78	0	1	aromatase inhibitor	low CCI	0	0
	98121	F	53	0	1	tamoxifene	low CCI	0	0
	98198	F	92	0	1	aromatase inhibitor	high CCI	0	0
	98308	F	54	0	1	aromatase inhibitor	low CCI	0	0
	98854	F	63	0	1	aromatase inhibitor	low CCI	0	0
	98882	F	67	1	1	aromatase inhibitor	high CCI	0	0
	99007	F	67	0	1	aromatase inhibitor	low CCI	0	0
	99166	F	75	0	1	aromatase inhibitor	high CCI	0	0
	99270	F	48	0	1	aromatase inhibitor	NA	0	0
	99412	F	85	0	1	aromatase inhibitor	high CCI	0	0
	99449	F	50	0	0	tamoxifene	low CCI	0	0
	99676	F	55	1	0	aromatase inhibitor	high CCI	0	0
	99879	F	75	0	1	aromatase inhibitor	low CCI	0	0
	100250	F	68	0	0	aromatase inhibitor	high CCI	0	0
	100252	F	45	0	1	tamoxifene	low CCI	1	0
	100480	F	65	0	1	aromatase inhibitor	low CCI	0	0
	100566	F	70	0	1	aromatase inhibitor	low CCI	0	0
	100964	F	68	0	0	aromatase inhibitor	high CCI	0	0
	101397	F	62	0	1	aromatase inhibitor	low CCI	0	0
	101507	F	86	0	0	fulvestrant	high CCI	0	0
	101529	F	77	1	1	aromatase inhibitor	high CCI	0	0
	101552	F	61	0	1	aromatase inhibitor	high CCI	0	0
	101560	F	53	0	1	aromatase inhibitor	low CCI	0	0
	101592	F	62	0	1	aromatase inhibitor	low CCI	0	0
	101641	F	70	0	1	aromatase inhibitor	low CCI	0	0
	101906	F	66	0	0	fulvestrant	low CCI	0	0
	102308	F	65	0	1	aromatase inhibitor	high CCI	0	0
	102643	F	52	0	1	aromatase inhibitor	low CCI	0	0
	102780	F	67	0	1	aromatase inhibitor	high CCI	0	0
	102818	F	61	0	0	aromatase inhibitor	high CCI	0	0
	102830	F	53	1	1	aromatase inhibitor	high CCI	0	0
	103271	F	48	0	1	tamoxifene	NA	0	0
	103311	F	57	0	1	tamoxifene	low CCI	0	0
	103773	F	82	1	1	tamoxifene	high CCI	0	0
	103806	F	57	0	1	tamoxifene	low CCI	0	0
	104149	F	52	0	1	tamoxifene	low CCI	0	0
	104233	F	70	0	1	aromatase inhibitor	high CCI	0	0
	104334	F	85	0	1	aromatase inhibitor	high CCI	0	0
	104734	F	47	1	1	aromatase inhibitor	high CCI	0	0
	104819	F	86	0	1	aromatase inhibitor	high CCI	0	0
	105402	F	56	0	0	tamoxifene	low CCI	0	0
	105510	F	86	0	0	aromatase inhibitor	high CCI	0	0
	105538	F	85	0	1	aromatase inhibitor	high CCI	0	0
	105542	F	62	0	1	aromatase inhibitor	low CCI	0	0
	105878	F	53	0	0	aromatase inhibitor	low CCI	0	0
	105902	F	50	0	0	tamoxifene	low CCI	0	0
	105931	F	43	0	1	aromatase inhibitor	NA	0	0
	106244	F	88	0	1	tamoxifene	high CCI	0	0
	106251	F	82	1	1	aromatase inhibitor	high CCI	0	0
	106264	F	71	1	1	aromatase inhibitor	high CCI	0	0
	106637	F	61	0	1	aromatase inhibitor	low CCI	0	0
	106644	F	60	1	1	aromatase inhibitor	high CCI	0	0
	106780	F	62	0	1	aromatase inhibitor	low CCI	0	0
	106954	F	84	0	1	aromatase inhibitor	high CCI	0	0
	106978	F	62	0	1	aromatase inhibitor	high CCI	0	0
	106984	F	61	0	1	aromatase inhibitor	low CCI	0	0
	107218	F	87	0	1	aromatase inhibitor	high CCI	0	0
	107391	F	72	1	1	fulvestrant	high CCI	0	0
	107453	M	27	0	0	tamoxifene	NA	0	0
	107621	F	87	1	1	aromatase inhibitor	high CCI	0	0
	107675	F	68	0	1	anti-Her2	high CCI	0	0
	107720	F	78	0	1	aromatase inhibitor	high CCI	0	0
	107792	F	75	0	1	aromatase inhibitor	low CCI	0	0
	107963	F	73	0	1	aromatase inhibitor	low CCI	0	0
	108008	F	65	1	1	aromatase inhibitor	high CCI	0	0
	108019	F	63	0	1	aromatase inhibitor	low CCI	0	0
	108501	F	56	0	1	aromatase inhibitor	low CCI	0	0
	108645	F	61	0	1	aromatase inhibitor	high CCI	0	0
	108728	F	60	0	1	aromatase inhibitor	high CCI	1	0
	108760	F	66	0	1	aromatase inhibitor	high CCI	0	0
	111675	F	80	0	1	aromatase inhibitor	high CCI	0	0
	111894	F	81	0	1	aromatase inhibitor	high CCI	0	0
	111949	F	70	1	1	aromatase inhibitor	high CCI	0	0
	112281	F	74	0	1	aromatase inhibitor	low CCI	0	0
	112833	F	53	0	1	tamoxifene	high CCI	0	0
	112974	F	75	0	1	aromatase inhibitor	high CCI	0	0
	113384	F	69	0	1	aromatase inhibitor	high CCI	0	0
	113953	F	74	0	1	aromatase inhibitor	high CCI	0	0
	114166	F	73	0	1	aromatase inhibitor	low CCI	0	0
	114468	F	66	0	1	aromatase inhibitor	low CCI	0	0
	114851	F	65	1	1	aromatase inhibitor	high CCI	0	0
	114886	F	49	0	1	tamoxifene	low CCI	0	0
	114945	F	48	0	1	tamoxifene	NA	0	0
	115139	F	75	0	1	aromatase inhibitor	low CCI	0	0
	115328	F	87	0	0	aromatase inhibitor	high CCI	1	1
	115356	F	75	0	0	aromatase inhibitor	high CCI	0	0
	115493	F	49	1	1	tamoxifene	high CCI	0	0
	116057	F	75	0	1	aromatase inhibitor	high CCI	0	0
	116992	F	79	0	1	aromatase inhibitor	high CCI	0	0
	117080	F	51	0	1	aromatase inhibitor	low CCI	0	0
	117419	F	89	0	1	aromatase inhibitor	high CCI	0	0
	117454	F	76	0	0	aromatase inhibitor	high CCI	0	0
	117542	F	49	0	1	aromatase inhibitor	low CCI	0	0
	117744	F	48	0	1	tamoxifene	low CCI	0	0
	118217	F	43	0	1	aromatase inhibitor	NA	0	0
	118892	F	92	0	1	aromatase inhibitor	high CCI	0	0
	118918	F	80	0	1	aromatase inhibitor	high CCI	0	0
	118931	F	76	0	1	aromatase inhibitor	low CCI	0	0
	119051	F	65	0	1	aromatase inhibitor	low CCI	0	0
	119071	F	59	0	1	aromatase inhibitor	low CCI	0	0
	119312	F	70	0	1	aromatase inhibitor	high CCI	0	0
	119716	F	69	1	1	aromatase inhibitor	high CCI	1	0
	119722	F	65	0	1	aromatase inhibitor	high CCI	0	0
	119726	F	63	0	1	aromatase inhibitor	low CCI	0	0
	119778	F	80	0	0	aromatase inhibitor	high CCI	0	0
	119866	F	49	0	0	aromatase inhibitor	low CCI	0	0
	120227	F	68	0	1	aromatase inhibitor	high CCI	0	0
	120238	F	66	0	1	aromatase inhibitor	low CCI	0	0
	120389	F	89	0	1	aromatase inhibitor	high CCI	0	0
	120433	F	66	0	0	aromatase inhibitor	high CCI	0	0
	120463	F	57	0	1	aromatase inhibitor	low CCI	0	0
	120668	F	48	0	1	tamoxifene	NA	0	0
	120735	F	86	0	1	aromatase inhibitor	high CCI	0	0
	120813	F	65	0	1	aromatase inhibitor	high CCI	0	0
	120863	F	56	0	1	aromatase inhibitor	low CCI	0	0
	121481	F	84	0	1	aromatase inhibitor	high CCI	0	0
	121512	F	83	0	1	aromatase inhibitor	high CCI	0	0
	121571	F	79	0	1	aromatase inhibitor	high CCI	0	0
	121640	F	76	0	1	tamoxifene	low CCI	0	0
	121735	F	69	0	1	aromatase inhibitor	high CCI	0	0
	121749	F	68	0	1	aromatase inhibitor	high CCI	0	0
	121841	F	63	0	1	aromatase inhibitor	low CCI	0	0
	122801	F	50	0	1	tamoxifene	low CCI	0	0
	122991	F	70	0	0	aromatase inhibitor	high CCI	0	0
	123000	F	68	1	1	aromatase inhibitor	high CCI	0	0
	123001	F	68	0	1	aromatase inhibitor	low CCI	0	0
	123138	F	74	1	1	aromatase inhibitor	high CCI	0	0
	123238	F	72	0	1	aromatase inhibitor	low CCI	0	0
	123735	F	51	0	1	aromatase inhibitor	low CCI	0	0
	124483	F	65	0	1	aromatase inhibitor	low CCI	0	0
	125108	F	72	0	1	aromatase inhibitor	low CCI	0	0
	125118	F	70	0	0	aromatase inhibitor	high CCI	0	0
	125192	F	56	0	1	tamoxifene	low CCI	0	0
	125602	F	70	1	1	aromatase inhibitor	high CCI	0	0
	125651	F	84	0	1	aromatase inhibitor	high CCI	0	0
	125732	F	67	1	0	aromatase inhibitor	high CCI	0	0
	125747	F	64	0	1	aromatase inhibitor	low CCI	0	0
	125954	F	77	0	1	aromatase inhibitor	low CCI	0	0
	125995	F	71	0	1	aromatase inhibitor	high CCI	0	0
	126004	F	70	0	1	aromatase inhibitor	high CCI	0	0
	126353	F	74	0	0	aromatase inhibitor	high CCI	0	0
	126473	F	60	0	1	tamoxifene	high CCI	0	0
	127377	F	69	0	1	aromatase inhibitor	high CCI	0	0
	127432	F	63	0	1	aromatase inhibitor	high CCI	0	0
	127606	F	52	1	1	aromatase inhibitor	high CCI	0	0
	127662	F	48	0	1	tamoxifene	NA	0	0
	127813	F	71	0	0	aromatase inhibitor	high CCI	0	0
	128484	F	65	0	1	fulvestrant	low CCI	0	0
	129647	F	66	0	1	aromatase inhibitor	low CCI	0	0
	130056	F	69	0	1	aromatase inhibitor	low CCI	0	0
	130253	M	53	1	1	tamoxifene	high CCI	0	0
	130568	F	72	0	1	aromatase inhibitor	low CCI	0	0
	130690	F	66	1	1	aromatase inhibitor	high CCI	0	0
	130736	F	75	0	1	fulvestrant	low CCI	0	0
	130772	F	84	0	1	aromatase inhibitor	high CCI	0	0
	130801	F	66	0	1	aromatase inhibitor	high CCI	0	0
	131083	F	51	0	1	tamoxifene	low CCI	0	0
	131266	F	54	0	1	aromatase inhibitor	low CCI	0	0
	131298	F	52	0	0	tamoxifene	low CCI	0	0
	131953	F	56	0	1	tamoxifene	low CCI	0	0
	131967	F	52	0	1	tamoxifene	low CCI	0	0
	132427	F	81	0	1	aromatase inhibitor	high CCI	0	0
	132440	F	67	0	1	aromatase inhibitor	high CCI	0	0
	132552	F	31	0	0	aromatase inhibitor	NA	0	0
	132795	F	55	0	0	aromatase inhibitor	low CCI	0	0
	132971	F	69	0	1	aromatase inhibitor	low CCI	0	0
	133039	F	84	0	1	aromatase inhibitor	high CCI	0	0
	133127	F	67	0	1	aromatase inhibitor	high CCI	0	0
	133130	F	67	0	1	tamoxifene	high CCI	0	0
	133150	F	63	0	1	aromatase inhibitor	high CCI	0	0
	133166	F	59	0	0	aromatase inhibitor	low CCI	0	0
	133169	F	55	0	0	aromatase inhibitor	low CCI	0	0
	133576	F	67	0	1	aromatase inhibitor	low CCI	0	0
	134023	F	80	0	1	aromatase inhibitor	high CCI	0	0
	134117	F	73	0	1	aromatase inhibitor	low CCI	0	0
	134221	F	51	0	1	aromatase inhibitor	low CCI	0	0
	134227	F	47	1	1	tamoxifene	high CCI	1	0
	135808	F	52	0	1	aromatase inhibitor	low CCI	0	0
	136066	F	80	0	1	aromatase inhibitor	high CCI	0	0
	136529	F	51	0	1	tamoxifene	low CCI	0	0
	136832	F	88	0	1	aromatase inhibitor	high CCI	0	0
	137079	F	61	0	1	aromatase inhibitor	low CCI	0	0
	138445	F	77	0	1	aromatase inhibitor	low CCI	0	0
	138693	F	74	0	1	aromatase inhibitor	low CCI	0	0
	138733	F	47	0	1	tamoxifene	low CCI	0	0
	138824	F	71	0	1	aromatase inhibitor	high CCI	0	0
	138825	F	69	0	1	aromatase inhibitor	low CCI	0	0
	138827	F	65	0	1	aromatase inhibitor	high CCI	0	0
	139258	F	79	0	0	aromatase inhibitor	high CCI	0	0
	139263	F	59	0	1	aromatase inhibitor	low CCI	0	0
	139339	F	70	0	1	aromatase inhibitor	low CCI	0	0
	139355	F	60	0	1	aromatase inhibitor	low CCI	0	0
	139659	F	84	1	0	aromatase inhibitor	high CCI	0	0
	139786	F	51	0	1	tamoxifene	low CCI	0	0
	140643	F	76	0	1	aromatase inhibitor	high CCI	0	0
	140644	F	69	0	1	aromatase inhibitor	high CCI	0	0
	140732	F	72	0	1	tamoxifene	low CCI	0	0
	140813	F	75	1	1	aromatase inhibitor	high CCI	0	0
	140888	F	57	0	1	aromatase inhibitor	low CCI	0	0
	141032	F	66	1	1	anti-Her2	high CCI	0	0
	141035	F	67	0	0	aromatase inhibitor	high CCI	0	0
	141531	F	61	0	0	tamoxifene	high CCI	0	0
	141614	F	85	0	1	aromatase inhibitor	high CCI	0	0
	141932	F	64	0	1	tamoxifene	low CCI	0	0
	142170	F	58	0	1	aromatase inhibitor	low CCI	0	0
	142496	F	57	0	1	aromatase inhibitor	low CCI	0	0
	142661	F	73	0	1	tamoxifene	high CCI	0	0
	142820	F	73	0	1	aromatase inhibitor	low CCI	0	0
	143035	F	76	0	1	aromatase inhibitor	low CCI	0	0
	143113	F	49	0	1	tamoxifene	low CCI	0	0
	143243	F	76	0	1	aromatase inhibitor	low CCI	0	0
	143414	F	61	0	1	aromatase inhibitor	high CCI	0	0
	143702	F	72	0	1	aromatase inhibitor	high CCI	0	0
	144268	F	45	0	0	tamoxifene	NA	0	0
	144376	F	88	0	1	aromatase inhibitor	high CCI	0	0
	144468	F	72	0	1	aromatase inhibitor	low CCI	0	0
	144637	F	48	0	1	tamoxifene	low CCI	0	0
	144706	F	84	0	1	aromatase inhibitor	high CCI	0	0
	145119	F	75	1	1	aromatase inhibitor	high CCI	0	0
	145260	F	73	0	1	aromatase inhibitor	low CCI	0	0
	145605	F	78	1	1	aromatase inhibitor	high CCI	0	0
	145618	F	63	0	1	aromatase inhibitor	high CCI	0	0
	145781	F	74	0	0	anti-Her2	high CCI	0	0
	145787	F	68	0	1	tamoxifene	low CCI	0	0
	146051	F	81	0	1	aromatase inhibitor	high CCI	0	0
	146057	F	75	1	1	aromatase inhibitor	high CCI	0	0
	146163	F	75	0	1	aromatase inhibitor	high CCI	0	0
	146164	F	68	0	1	aromatase inhibitor	high CCI	0	0
	146443	F	73	0	1	aromatase inhibitor	low CCI	0	0
	146536	F	93	0	1	aromatase inhibitor	high CCI	0	0
	146747	F	58	0	1	aromatase inhibitor	low CCI	0	0
	146971	F	87	1	1	aromatase inhibitor	high CCI	0	0
	147064	F	66	0	1	tamoxifene	low CCI	0	0
	147296	M	53	0	1	tamoxifene	low CCI	0	0
	147340	F	67	0	1	aromatase inhibitor	low CCI	0	0
	147549	F	46	0	1	aromatase inhibitor	NA	0	0
	148012	F	70	0	0	aromatase inhibitor	high CCI	0	0
	148181	F	71	0	0	aromatase inhibitor	high CCI	0	0
	148278	F	59	0	1	aromatase inhibitor	low CCI	0	0
	148459	F	45	0	1	tamoxifene	low CCI	0	0
	148856	F	76	1	1	aromatase inhibitor	high CCI	0	0
	149066	F	53	0	1	tamoxifene	low CCI	0	0
	149152	F	46	0	1	tamoxifene	NA	0	0
	149197	F	44	0	1	tamoxifene	NA	0	0
	149323	F	77	0	0	aromatase inhibitor	low CCI	0	0
	149333	F	73	0	1	aromatase inhibitor	high CCI	0	0
	149346	F	67	1	1	aromatase inhibitor	high CCI	0	0
	149365	F	54	0	1	tamoxifene	low CCI	0	0
	149513	F	70	0	1	aromatase inhibitor	high CCI	0	0
	149636	F	50	0	1	tamoxifene	low CCI	0	0
	149861	F	64	0	1	aromatase inhibitor	high CCI	0	0
	149949	F	90	0	0	aromatase inhibitor	high CCI	0	0
	150181	F	61	0	1	aromatase inhibitor	low CCI	0	0
	150239	F	90	0	1	aromatase inhibitor	high CCI	0	0
	150296	F	75	0	1	aromatase inhibitor	low CCI	0	0
	150942	F	86	0	1	aromatase inhibitor	high CCI	0	0
	151092	F	73	0	1	aromatase inhibitor	low CCI	0	0
	151121	F	77	0	1	aromatase inhibitor	high CCI	0	0
	151161	F	60	1	1	aromatase inhibitor	high CCI	0	0
	151188	F	57	0	1	aromatase inhibitor	low CCI	0	0
	151255	F	58	0	1	tamoxifene	low CCI	0	0
	151392	F	81	0	1	aromatase inhibitor	high CCI	0	0
	152191	F	72	0	1	aromatase inhibitor	low CCI	0	0
	152659	F	78	0	1	aromatase inhibitor	high CCI	0	0
	152990	F	83	0	1	aromatase inhibitor	high CCI	0	0
	153534	F	58	0	1	aromatase inhibitor	low CCI	0	0
	153544	F	58	0	1	tamoxifene	low CCI	0	0
	153721	F	80	0	1	aromatase inhibitor	high CCI	0	0
	153774	F	86	0	1	aromatase inhibitor	high CCI	0	0
	153845	F	73	0	0	aromatase inhibitor	high CCI	0	0
	154156	F	66	0	1	aromatase inhibitor	high CCI	0	0
	154179	F	73	0	1	aromatase inhibitor	high CCI	0	0
	154202	F	82	0	1	aromatase inhibitor	high CCI	0	0
	154893	F	55	0	1	aromatase inhibitor	low CCI	0	0
	154964	F	61	0	1	aromatase inhibitor	low CCI	0	0
	155615	F	48	0	1	tamoxifene	low CCI	0	0
	155623	F	48	0	0	aromatase inhibitor	NA	0	0
	155799	F	76	0	1	anti-Her2	high CCI	0	0
	156522	F	81	0	1	aromatase inhibitor	high CCI	0	0
	156609	F	91	0	1	aromatase inhibitor	high CCI	0	0
	157062	F	70	0	1	aromatase inhibitor	high CCI	0	0
	157219	F	50	0	0	tamoxifene	low CCI	0	0
	157328	F	80	0	0	aromatase inhibitor	high CCI	0	0
	157811	F	53	0	1	tamoxifene	low CCI	0	0
	157820	F	51	0	1	tamoxifene	low CCI	0	0
	157841	F	48	0	1	tamoxifene	low CCI	0	0
	158123	F	80	0	1	aromatase inhibitor	high CCI	0	0
	158185	F	76	0	1	aromatase inhibitor	low CCI	0	0
	158613	F	54	0	1	aromatase inhibitor	low CCI	0	0
	158707	F	86	0	1	aromatase inhibitor	high CCI	0	0
	158916	F	58	0	0	aromatase inhibitor	low CCI	0	0
	158944	F	51	0	1	tamoxifene	low CCI	0	0
	159284	F	55	0	1	tamoxifene	low CCI	0	0
	160068	F	64	0	1	aromatase inhibitor	low CCI	0	0
	160554	F	92	0	1	aromatase inhibitor	high CCI	0	0
	160849	F	48	0	1	aromatase inhibitor	low CCI	0	0
	161111	F	77	0	1	aromatase inhibitor	low CCI	0	0
	161415	M	63	0	0	aromatase inhibitor	low CCI	0	0
	161566	F	58	1	1	aromatase inhibitor	high CCI	0	0
	161663	F	62	1	0	aromatase inhibitor	high CCI	0	0
	161823	F	89	0	1	aromatase inhibitor	high CCI	0	0
	162054	F	63	0	0	aromatase inhibitor	high CCI	0	0
	162255	F	76	0	0	aromatase inhibitor	low CCI	0	0
	162259	F	74	0	1	aromatase inhibitor	low CCI	0	0
	162407	F	65	1	0	aromatase inhibitor	high CCI	0	0
	162701	F	83	0	0	aromatase inhibitor	high CCI	0	0
	162781	F	75	0	0	aromatase inhibitor	high CCI	0	0
	162786	F	71	0	0	aromatase inhibitor	low CCI	0	0
	163143	F	61	0	0	aromatase inhibitor	high CCI	0	0
	163145	F	61	0	0	anti-Her2	high CCI	0	0
	163193	F	73	0	1	aromatase inhibitor	high CCI	0	0
	163497	F	82	1	1	aromatase inhibitor	high CCI	0	0
	163771	F	74	0	1	aromatase inhibitor	high CCI	0	0
	163997	F	33	0	0	aromatase inhibitor	NA	0	0
	164285	F	65	0	1	aromatase inhibitor	low CCI	0	0
	164296	F	47	0	1	aromatase inhibitor	low CCI	0	0
	164498	F	51	0	1	tamoxifene	low CCI	0	0
	164522	F	47	1	0	tamoxifene	high CCI	0	0
	164912	F	74	0	1	aromatase inhibitor	high CCI	0	0
	165001	F	62	0	1	aromatase inhibitor	high CCI	0	0
	165054	F	62	0	1	aromatase inhibitor	high CCI	0	0
	165078	F	50	0	0	tamoxifene	low CCI	0	0
	165107	F	86	0	0	fulvestrant	high CCI	0	0
	165147	F	70	0	1	aromatase inhibitor	high CCI	0	0
	165544	F	76	0	1	aromatase inhibitor	high CCI	0	0
	165597	F	64	0	1	aromatase inhibitor	low CCI	0	0
	165730	F	77	1	1	aromatase inhibitor	high CCI	0	0
	165751	F	61	0	1	aromatase inhibitor	low CCI	0	0
	165893	F	64	0	1	aromatase inhibitor	high CCI	0	0
	165899	F	62	0	1	aromatase inhibitor	high CCI	0	0
	166085	F	72	0	1	aromatase inhibitor	low CCI	0	0
	166435	F	75	0	0	aromatase inhibitor	high CCI	0	0
	166649	F	48	0	1	tamoxifene	low CCI	0	0
	167235	F	75	0	1	aromatase inhibitor	low CCI	0	0
	168561	F	82	0	1	aromatase inhibitor	high CCI	0	0
	168954	F	78	0	1	aromatase inhibitor	high CCI	0	0
	169119	F	79	0	1	aromatase inhibitor	low CCI	0	0
	169158	F	66	0	1	aromatase inhibitor	high CCI	0	0
	169256	F	62	0	1	aromatase inhibitor	high CCI	0	0
	170150	F	54	0	1	aromatase inhibitor	low CCI	0	0
	170187	F	50	0	1	tamoxifene	low CCI	0	0
	170631	F	82	1	0	aromatase inhibitor	high CCI	0	0
	171219	F	82	0	0	aromatase inhibitor	high CCI	0	0
	171243	F	67	0	1	aromatase inhibitor	low CCI	0	0
	171425	F	42	0	1	tamoxifene	low CCI	0	0
	171476	F	76	0	1	aromatase inhibitor	high CCI	0	0
	172016	F	83	0	1	tamoxifene	high CCI	1	0
	172022	F	52	0	1	aromatase inhibitor	low CCI	0	0
	172137	F	80	0	1	aromatase inhibitor	high CCI	0	0
	172155	F	69	0	1	aromatase inhibitor	high CCI	0	0
	172277	F	73	1	1	aromatase inhibitor	high CCI	0	0
	172297	F	69	0	1	aromatase inhibitor	high CCI	0	0
	172957	F	56	1	1	aromatase inhibitor	high CCI	0	0
	173177	F	88	0	1	aromatase inhibitor	high CCI	0	0
	173500	F	50	0	1	tamoxifene	low CCI	0	0
	173648	F	83	0	1	aromatase inhibitor	high CCI	0	0
	173930	F	83	0	1	fulvestrant	high CCI	0	0
	174340	F	44	0	1	tamoxifene	low CCI	0	0
	174402	F	81	0	1	aromatase inhibitor	high CCI	0	0
	174421	F	72	0	1	aromatase inhibitor	high CCI	0	0
	174506	F	74	0	1	aromatase inhibitor	high CCI	0	0
	174718	F	82	1	1	aromatase inhibitor	high CCI	0	0
	175075	F	67	0	1	aromatase inhibitor	low CCI	0	0
	175308	F	89	0	1	aromatase inhibitor	high CCI	0	0
	175741	F	52	0	1	tamoxifene	low CCI	0	0
	175757	F	48	0	1	tamoxifene	NA	0	0
	175886	F	70	0	1	aromatase inhibitor	high CCI	0	0
	175962	F	77	0	1	aromatase inhibitor	low CCI	0	0
	176109	F	80	0	1	aromatase inhibitor	high CCI	0	0
	176386	F	65	0	1	aromatase inhibitor	low CCI	0	0
	176417	F	54	0	1	aromatase inhibitor	low CCI	0	0
	176634	F	68	0	1	aromatase inhibitor	low CCI	0	0
	176652	F	74	1	1	aromatase inhibitor	high CCI	0	0
	176698	F	79	0	1	tamoxifene	low CCI	0	0
	176767	F	74	0	1	aromatase inhibitor	high CCI	0	0
	177142	F	53	0	1	aromatase inhibitor	low CCI	0	0
	177420	F	82	0	1	aromatase inhibitor	high CCI	0	0
	177487	F	60	0	0	aromatase inhibitor	high CCI	0	0
	177508	F	64	0	1	aromatase inhibitor	low CCI	0	0
	178107	F	74	0	1	aromatase inhibitor	high CCI	0	0
	178192	F	63	0	0	aromatase inhibitor	high CCI	0	0
	179079	M	90	0	0	aromatase inhibitor	high CCI	0	0
	179523	F	70	0	1	aromatase inhibitor	low CCI	0	0
	179575	F	60	0	1	aromatase inhibitor	high CCI	0	0
	179728	F	86	0	1	aromatase inhibitor	high CCI	0	0
	179897	F	81	0	1	aromatase inhibitor	high CCI	0	0
	180017	F	67	0	1	aromatase inhibitor	high CCI	0	0
	180118	F	48	0	0	aromatase inhibitor	low CCI	0	0
	180376	F	78	0	1	aromatase inhibitor	low CCI	0	0
	181050	F	86	0	1	aromatase inhibitor	high CCI	0	0
	181083	F	65	1	0	aromatase inhibitor	high CCI	0	0
	181087	F	63	0	1	aromatase inhibitor	low CCI	0	0
	181373	F	61	0	1	aromatase inhibitor	low CCI	0	0
	181374	F	60	0	0	aromatase inhibitor	high CCI	0	0
	182108	F	70	0	1	aromatase inhibitor	low CCI	0	0
	182312	M	77	0	1	tamoxifene	high CCI	0	0
	182399	F	80	0	1	aromatase inhibitor	high CCI	0	0
	182408	F	66	0	1	aromatase inhibitor	low CCI	0	0
	182561	F	74	0	1	aromatase inhibitor	high CCI	0	0
	183022	F	72	0	0	tamoxifene	high CCI	0	0
	183158	F	84	0	1	aromatase inhibitor	high CCI	0	0
	183316	F	93	0	0	aromatase inhibitor	high CCI	0	0
	183681	F	52	0	1	tamoxifene	low CCI	0	0
	183973	F	66	0	1	aromatase inhibitor	high CCI	0	0
	183993	F	53	0	1	aromatase inhibitor	low CCI	0	0
	184157	F	63	0	1	aromatase inhibitor	high CCI	0	0
	184811	F	62	0	1	aromatase inhibitor	high CCI	0	0
	184864	F	91	0	1	aromatase inhibitor	high CCI	0	0
	184870	F	81	1	1	aromatase inhibitor	high CCI	0	0
	184885	F	80	1	1	aromatase inhibitor	high CCI	0	0
	185004	F	61	0	1	fulvestrant	low CCI	0	0
	185068	F	60	0	1	aromatase inhibitor	high CCI	0	0
	185123	F	49	0	1	aromatase inhibitor	NA	0	0
	185217	F	46	0	0	tamoxifene	low CCI	0	0
	185252	F	72	0	1	aromatase inhibitor	high CCI	0	0
	185263	F	67	0	1	tamoxifene	high CCI	0	0
	185478	F	85	0	0	aromatase inhibitor	high CCI	0	0
	185516	F	82	0	1	aromatase inhibitor	high CCI	0	0
	185894	F	66	1	1	aromatase inhibitor	high CCI	0	0
	186207	F	80	0	1	aromatase inhibitor	high CCI	0	0
	186334	F	49	0	1	tamoxifene	low CCI	0	0
	186492	F	71	0	1	aromatase inhibitor	low CCI	0	0
	186512	F	61	0	1	aromatase inhibitor	low CCI	0	0
	187312	F	73	0	1	aromatase inhibitor	low CCI	0	0
	187700	F	74	0	0	aromatase inhibitor	high CCI	0	0
	187728	F	64	0	1	aromatase inhibitor	high CCI	0	0
	187858	M	89	0	1	tamoxifene	high CCI	0	0
	187947	F	59	0	1	aromatase inhibitor	low CCI	0	0
	187950	F	53	0	1	aromatase inhibitor	low CCI	0	0
	188002	F	87	0	1	aromatase inhibitor	high CCI	0	0
	188221	F	69	0	0	aromatase inhibitor	high CCI	0	0
	188311	F	64	0	1	aromatase inhibitor	high CCI	0	0
	188328	F	61	0	1	aromatase inhibitor	high CCI	0	0
	188331	F	60	1	1	aromatase inhibitor	high CCI	0	0
	188928	F	72	0	1	aromatase inhibitor	high CCI	0	0
	189037	F	66	0	1	aromatase inhibitor	low CCI	0	0
	189099	F	58	0	1	aromatase inhibitor	low CCI	0	0
	189118	F	56	0	1	aromatase inhibitor	low CCI	0	0
	189142	F	55	0	0	aromatase inhibitor	low CCI	0	0
	189863	F	77	0	1	aromatase inhibitor	low CCI	0	0
	190034	F	88	0	1	aromatase inhibitor	high CCI	0	0
	190060	F	56	0	1	aromatase inhibitor	low CCI	0	0
	190083	F	79	0	0	aromatase inhibitor	high CCI	0	0
	190388	F	73	0	1	tamoxifene	low CCI	0	0
	190515	F	55	0	1	aromatase inhibitor	low CCI	0	0
	190778	F	65	0	1	aromatase inhibitor	low CCI	0	0
	190841	F	57	0	1	aromatase inhibitor	low CCI	0	0
	190876	F	54	0	1	tamoxifene	low CCI	0	0
	191209	F	78	0	1	aromatase inhibitor	high CCI	0	0
	191277	F	72	0	1	aromatase inhibitor	low CCI	0	0
	191421	F	62	1	1	aromatase inhibitor	high CCI	0	0
	191488	F	54	1	1	aromatase inhibitor	high CCI	0	0
	191520	F	51	0	1	tamoxifene	low CCI	0	0
	191657	F	74	0	1	aromatase inhibitor	low CCI	0	0
	191950	F	47	0	1	tamoxifene	NA	0	0
	192092	F	49	0	1	tamoxifene	low CCI	0	0
	192423	F	68	0	1	aromatase inhibitor	high CCI	0	0
	192644	F	76	0	1	aromatase inhibitor	low CCI	0	0
	192977	F	84	0	1	aromatase inhibitor	high CCI	0	0
	193140	F	54	0	1	tamoxifene	low CCI	0	0
	193401	F	85	0	0	aromatase inhibitor	high CCI	0	0
	194240	F	78	1	1	fulvestrant	high CCI	0	0
	194300	F	49	1	1	aromatase inhibitor	high CCI	0	0
	194339	F	56	0	1	aromatase inhibitor	low CCI	0	0
	194737	F	85	0	1	aromatase inhibitor	high CCI	0	0
	195320	F	84	0	1	aromatase inhibitor	high CCI	0	0
	195636	F	87	0	0	aromatase inhibitor	high CCI	0	0
	195838	F	73	0	1	fulvestrant	low CCI	0	0
	195878	F	82	0	1	aromatase inhibitor	high CCI	0	0
	196099	M	73	0	1	tamoxifene	low CCI	0	0
	196900	F	69	0	1	aromatase inhibitor	low CCI	0	0
	197054	F	69	0	1	aromatase inhibitor	low CCI	0	0
	197099	F	67	1	1	aromatase inhibitor	high CCI	0	0
	197241	F	81	0	1	aromatase inhibitor	high CCI	0	0
	197484	F	50	0	1	tamoxifene	low CCI	0	0
	197590	F	50	0	1	tamoxifene	low CCI	0	0
	197711	F	81	0	0	aromatase inhibitor	high CCI	0	0
	198166	F	73	1	1	aromatase inhibitor	high CCI	0	0
	198395	F	71	0	0	aromatase inhibitor	low CCI	0	0
	198527	F	70	0	1	anti-Her2	low CCI	0	0
	198528	F	69	0	1	aromatase inhibitor	low CCI	0	0
	198592	F	69	0	1	aromatase inhibitor	high CCI	0	0
	198685	F	57	0	1	aromatase inhibitor	low CCI	0	0
	198841	F	74	0	1	tamoxifene	low CCI	0	0
	198867	F	60	0	1	aromatase inhibitor	high CCI	0	0
	198881	F	55	0	1	aromatase inhibitor	low CCI	0	0
	198979	F	66	0	0	aromatase inhibitor	high CCI	0	0
	199433	F	61	0	1	aromatase inhibitor	low CCI	0	0
	199766	F	71	0	1	aromatase inhibitor	low CCI	0	0
	200272	F	54	0	1	tamoxifene	low CCI	0	0
	200312	F	79	0	1	aromatase inhibitor	low CCI	0	0
	200782	F	79	0	1	aromatase inhibitor	low CCI	0	0
	200851	F	91	0	0	tamoxifene	high CCI	0	0
	200956	F	62	0	1	tamoxifene	high CCI	0	0
	201030	F	70	0	1	aromatase inhibitor	low CCI	0	0
	201111	F	76	0	1	aromatase inhibitor	low CCI	0	0
	201867	F	72	0	1	aromatase inhibitor	high CCI	0	0
	201957	F	64	0	1	aromatase inhibitor	high CCI	0	0
	202015	F	48	0	1	tamoxifene	NA	0	0
	202092	F	73	0	1	aromatase inhibitor	high CCI	0	0
	202099	F	71	1	1	aromatase inhibitor	high CCI	0	0
	202189	F	69	0	1	tamoxifene	low CCI	0	0
	202207	F	84	1	0	aromatase inhibitor	high CCI	0	0
	202498	F	82	0	1	aromatase inhibitor	high CCI	0	0
	203096	F	49	0	0	tamoxifene	low CCI	0	0
	203110	F	46	0	1	tamoxifene	NA	0	0
	203209	F	52	0	1	tamoxifene	low CCI	0	0
	203888	F	54	0	1	aromatase inhibitor	low CCI	0	0
	203934	F	85	0	1	aromatase inhibitor	high CCI	0	0
	204346	F	62	0	1	aromatase inhibitor	low CCI	0	0
	204533	F	78	0	1	aromatase inhibitor	low CCI	0	0
	204558	F	45	0	1	aromatase inhibitor	NA	0	0
	204599	F	67	1	1	aromatase inhibitor	high CCI	0	0
	204894	F	44	1	1	aromatase inhibitor	high CCI	0	0
	204928	F	43	0	1	tamoxifene	NA	0	0
	204949	F	58	0	0	aromatase inhibitor	low CCI	0	0
	205370	F	79	1	1	aromatase inhibitor	high CCI	0	0
	205406	F	68	0	1	aromatase inhibitor	low CCI	0	0
	205437	F	52	0	1	aromatase inhibitor	low CCI	0	0
	205484	F	90	0	1	aromatase inhibitor	high CCI	0	0
	205644	F	61	0	1	aromatase inhibitor	low CCI	0	0
	205687	F	54	0	0	anti-Her2	low CCI	0	0
	205809	F	84	0	1	aromatase inhibitor	high CCI	0	0
	206065	F	85	0	1	aromatase inhibitor	high CCI	0	0
	206533	F	71	0	0	aromatase inhibitor	high CCI	0	0
	206566	F	78	0	1	aromatase inhibitor	low CCI	0	0
	207072	F	71	0	1	tamoxifene	low CCI	0	0
	207181	F	80	0	1	aromatase inhibitor	high CCI	0	0
	207211	M	62	1	0	tamoxifene	high CCI	0	0
	207302	F	68	0	1	aromatase inhibitor	high CCI	0	0
	207424	F	55	1	1	aromatase inhibitor	high CCI	0	0
	207652	F	70	0	1	aromatase inhibitor	high CCI	0	0
	207663	F	59	0	0	aromatase inhibitor	low CCI	0	0
	207947	F	45	1	0	aromatase inhibitor	high CCI	0	0
	208162	F	49	0	1	tamoxifene	NA	0	0
	208290	F	57	0	1	aromatase inhibitor	low CCI	0	0
	208563	F	47	0	1	tamoxifene	NA	0	0
	208724	F	41	1	1	tamoxifene	high CCI	0	0
	208752	F	45	1	0	aromatase inhibitor	high CCI	0	0
	208845	F	54	0	1	aromatase inhibitor	low CCI	0	0
	208929	F	70	0	1	aromatase inhibitor	high CCI	0	0
	209144	F	74	0	1	aromatase inhibitor	low CCI	0	0
	209219	F	62	0	1	tamoxifene	low CCI	0	0
	209300	F	58	0	1	aromatase inhibitor	low CCI	0	0
	209583	F	68	0	1	aromatase inhibitor	low CCI	0	0
	209677	F	59	1	1	tamoxifene	high CCI	0	0
	209988	F	51	0	1	tamoxifene	low CCI	0	0
	210291	F	73	0	1	aromatase inhibitor	low CCI	0	0
	210533	F	70	0	1	aromatase inhibitor	low CCI	0	0
	210599	F	90	0	0	aromatase inhibitor	high CCI	0	0
	210642	F	72	0	1	aromatase inhibitor	high CCI	0	0
	210869	F	55	0	0	aromatase inhibitor	low CCI	0	0
	211004	F	93	0	1	aromatase inhibitor	high CCI	0	0
	211361	F	76	0	1	aromatase inhibitor	high CCI	0	0
	211365	F	63	0	1	aromatase inhibitor	low CCI	0	0
	211866	F	71	0	0	aromatase inhibitor	low CCI	0	0
	212373	F	96	0	1	aromatase inhibitor	high CCI	0	0
	212627	F	78	0	1	aromatase inhibitor	low CCI	0	0
	212643	F	74	0	1	aromatase inhibitor	low CCI	0	0
	212650	F	73	1	1	aromatase inhibitor	high CCI	0	0
	213055	F	73	0	1	aromatase inhibitor	low CCI	0	0
	213209	F	84	1	1	aromatase inhibitor	high CCI	0	0
	213455	F	77	0	0	aromatase inhibitor	high CCI	0	0
	213639	F	37	1	0	aromatase inhibitor	high CCI	0	0
	213908	F	62	0	0	aromatase inhibitor	low CCI	0	0
	213909	F	61	0	1	aromatase inhibitor	low CCI	0	0
	213922	F	91	0	0	aromatase inhibitor	high CCI	0	0
	213997	F	86	0	1	aromatase inhibitor	high CCI	0	0
	214227	F	73	1	0	aromatase inhibitor	high CCI	0	0
	214586	F	64	0	1	aromatase inhibitor	low CCI	0	0
	214778	F	79	0	1	aromatase inhibitor	low CCI	0	0
	214822	F	53	0	1	aromatase inhibitor	low CCI	0	0
	215054	F	51	1	1	tamoxifene	high CCI	0	0
	215172	F	78	0	1	aromatase inhibitor	low CCI	0	0
	215366	F	55	0	1	aromatase inhibitor	low CCI	0	0
	215622	F	68	0	0	aromatase inhibitor	high CCI	0	0
	216111	F	54	0	1	tamoxifene	low CCI	0	0
	216183	F	50	0	1	tamoxifene	low CCI	0	0
	216543	F	64	0	1	aromatase inhibitor	low CCI	0	0
	216739	F	75	0	1	aromatase inhibitor	high CCI	0	0
	216752	F	68	0	1	aromatase inhibitor	low CCI	0	0
	216830	F	73	0	1	aromatase inhibitor	high CCI	0	0
	216952	F	74	0	1	aromatase inhibitor	low CCI	0	0
	217305	F	56	0	1	aromatase inhibitor	low CCI	0	0
	217498	F	67	0	1	fulvestrant	low CCI	0	0
	217730	F	55	0	0	tamoxifene	low CCI	0	0
	218217	F	79	0	1	anti-Her2	high CCI	0	0
	218452	F	81	0	0	aromatase inhibitor	high CCI	0	0
	218453	F	72	0	1	aromatase inhibitor	high CCI	0	0
	218499	F	87	1	0	aromatase inhibitor	high CCI	0	0
	218574	F	51	0	1	aromatase inhibitor	low CCI	0	0
	218826	F	73	0	1	aromatase inhibitor	low CCI	0	0
	218900	F	54	0	1	tamoxifene	low CCI	0	0
	219173	F	52	0	1	tamoxifene	low CCI	0	0
	219179	F	90	0	1	aromatase inhibitor	high CCI	0	0
	219227	F	72	0	1	aromatase inhibitor	high CCI	0	0
	219556	F	92	0	1	tamoxifene	high CCI	0	0
	219653	F	77	0	1	aromatase inhibitor	low CCI	0	0
	219698	F	70	1	1	aromatase inhibitor	high CCI	0	0
	219761	F	75	0	1	aromatase inhibitor	high CCI	0	0
	220342	F	56	0	1	tamoxifene	low CCI	0	0
	220394	F	74	0	0	aromatase inhibitor	high CCI	0	0
	220653	F	73	0	1	aromatase inhibitor	low CCI	0	0
	221050	F	44	0	1	tamoxifene	NA	0	0
	221324	F	94	0	1	aromatase inhibitor	high CCI	0	0
	221389	F	70	0	1	aromatase inhibitor	low CCI	0	0
	221728	F	76	0	1	aromatase inhibitor	high CCI	0	0
	221821	F	78	0	1	aromatase inhibitor	low CCI	0	0
	221877	F	82	0	0	aromatase inhibitor	high CCI	0	0
	222154	F	51	0	1	tamoxifene	low CCI	0	0
	222611	F	82	1	1	aromatase inhibitor	high CCI	0	0
	222861	M	55	0	1	tamoxifene	low CCI	0	0
	222919	F	73	0	1	aromatase inhibitor	high CCI	0	0
	223452	F	82	0	1	aromatase inhibitor	high CCI	0	0
	223786	F	64	0	1	tamoxifene	high CCI	0	0
	224413	F	86	0	1	aromatase inhibitor	high CCI	0	0
	224589	F	72	0	1	aromatase inhibitor	low CCI	0	0
	224681	F	45	0	1	tamoxifene	low CCI	0	0
	224925	F	54	0	1	aromatase inhibitor	low CCI	0	0
	225359	F	42	0	1	aromatase inhibitor	low CCI	0	0
	225520	F	69	0	1	aromatase inhibitor	high CCI	0	0
	225601	F	73	0	1	aromatase inhibitor	low CCI	0	0
	225747	F	66	0	0	aromatase inhibitor	low CCI	0	0
	225761	F	50	0	1	aromatase inhibitor	low CCI	0	0
	225859	F	90	0	1	aromatase inhibitor	high CCI	0	0
	226140	F	73	0	1	aromatase inhibitor	low CCI	0	0
	226206	F	79	0	1	aromatase inhibitor	low CCI	0	0
	226219	F	70	0	1	aromatase inhibitor	high CCI	0	0
	226488	F	66	0	1	aromatase inhibitor	low CCI	0	0
	226496	F	83	0	0	aromatase inhibitor	high CCI	0	0
	226559	F	64	1	1	aromatase inhibitor	high CCI	0	0
	227103	F	75	0	1	fulvestrant	low CCI	0	0
	227160	F	60	0	1	aromatase inhibitor	high CCI	0	0
	227175	F	55	0	0	aromatase inhibitor	low CCI	0	0
	227178	F	53	1	1	aromatase inhibitor	high CCI	0	0
	227308	F	69	0	1	aromatase inhibitor	high CCI	0	0
	227398	M	84	0	1	aromatase inhibitor	high CCI	0	0
	227457	F	70	0	1	aromatase inhibitor	low CCI	0	0
	227517	F	65	0	1	aromatase inhibitor	high CCI	0	0
	227618	F	92	0	1	aromatase inhibitor	high CCI	0	0
	227641	F	49	0	0	tamoxifene	low CCI	0	0
	227769	F	51	0	1	tamoxifene	low CCI	0	0
	227891	F	52	0	1	aromatase inhibitor	low CCI	0	0
	228312	F	78	0	1	fulvestrant	low CCI	0	0
	228439	F	63	0	1	aromatase inhibitor	low CCI	0	0
	228825	F	64	0	1	aromatase inhibitor	low CCI	0	0
	229036	F	73	0	1	aromatase inhibitor	low CCI	0	0
	229416	F	63	0	0	aromatase inhibitor	high CCI	0	0
	229644	F	79	0	1	aromatase inhibitor	high CCI	0	0
	229669	F	70	0	0	aromatase inhibitor	high CCI	0	0
	229676	F	65	0	1	aromatase inhibitor	low CCI	0	0
	230946	F	35	0	1	aromatase inhibitor	low CCI	0	0
	231082	F	75	0	1	aromatase inhibitor	low CCI	0	0
	231113	F	46	0	1	tamoxifene	low CCI	0	0
	231226	F	78	0	1	aromatase inhibitor	high CCI	0	0
	231319	F	78	1	0	aromatase inhibitor	high CCI	0	0
	231430	F	60	0	1	aromatase inhibitor	low CCI	0	0
	231462	F	67	0	1	aromatase inhibitor	low CCI	0	0
	231655	F	71	0	1	aromatase inhibitor	low CCI	0	0
	231848	F	57	0	0	aromatase inhibitor	low CCI	0	0
	232004	F	45	1	1	tamoxifene	high CCI	0	0
	232240	F	58	0	1	aromatase inhibitor	low CCI	0	0
	232722	M	65	0	1	anti-Her2	low CCI	0	0
	232801	F	58	0	1	aromatase inhibitor	low CCI	0	0
	233090	F	62	0	1	aromatase inhibitor	high CCI	0	0
	234556	F	82	0	1	tamoxifene	high CCI	0	0
	234675	F	59	0	1	tamoxifene	low CCI	0	0
	234677	F	57	0	1	aromatase inhibitor	low CCI	0	0
	234679	F	53	0	1	tamoxifene	low CCI	0	0
	234809	F	52	0	0	aromatase inhibitor	low CCI	0	0
	234930	F	75	0	1	aromatase inhibitor	low CCI	0	0
	235013	F	84	0	1	aromatase inhibitor	high CCI	0	0
	235189	F	81	0	1	aromatase inhibitor	high CCI	0	0
	235278	F	68	0	0	aromatase inhibitor	high CCI	0	0
	235412	F	81	0	1	aromatase inhibitor	high CCI	0	0
	235448	F	69	0	1	aromatase inhibitor	high CCI	0	0
	235538	F	69	0	1	aromatase inhibitor	low CCI	0	0
	235544	F	67	0	1	aromatase inhibitor	high CCI	0	0
	235759	F	72	0	1	aromatase inhibitor	high CCI	0	0
	235983	F	50	0	1	tamoxifene	low CCI	0	0
	236576	F	79	0	1	tamoxifene	low CCI	0	0
	236669	M	78	0	0	tamoxifene	high CCI	0	0
	236868	F	80	0	1	aromatase inhibitor	high CCI	0	0
	237313	F	78	0	1	tamoxifene	low CCI	0	0
	237577	F	75	0	1	aromatase inhibitor	high CCI	0	0
	237692	F	67	0	1	aromatase inhibitor	high CCI	0	0
	237808	F	76	0	0	aromatase inhibitor	high CCI	0	0
	237941	F	73	0	1	tamoxifene	low CCI	0	0
	238172	F	69	1	0	aromatase inhibitor	high CCI	0	0
	238288	F	79	0	0	aromatase inhibitor	high CCI	0	0
	238432	F	79	0	1	aromatase inhibitor	low CCI	0	0
	238447	F	85	0	0	aromatase inhibitor	high CCI	0	0
	238513	F	65	0	1	aromatase inhibitor	low CCI	0	0
	238521	F	54	0	1	aromatase inhibitor	low CCI	0	0
	239366	F	74	0	1	aromatase inhibitor	high CCI	0	0
	239959	F	55	0	0	aromatase inhibitor	low CCI	0	0
	240000	F	72	0	1	aromatase inhibitor	high CCI	0	0
	240017	F	55	0	1	tamoxifene	low CCI	0	0
	240355	F	72	0	0	aromatase inhibitor	high CCI	0	0
	240725	F	56	0	1	aromatase inhibitor	low CCI	0	0
	240798	F	72	0	1	aromatase inhibitor	high CCI	0	0
	240967	F	53	0	1	aromatase inhibitor	low CCI	0	0
	241615	F	73	0	1	aromatase inhibitor	low CCI	0	0
	241776	F	80	0	0	aromatase inhibitor	high CCI	0	0
	241794	F	69	0	0	aromatase inhibitor	high CCI	0	0
	241841	F	85	0	1	aromatase inhibitor	high CCI	0	0
	241862	F	76	0	1	aromatase inhibitor	high CCI	0	0
	241949	F	57	0	1	aromatase inhibitor	low CCI	0	0
	242084	F	83	0	1	aromatase inhibitor	high CCI	0	0
	242231	F	66	0	1	aromatase inhibitor	high CCI	0	0
	242472	F	46	0	1	tamoxifene	low CCI	0	0
	242562	F	77	0	1	aromatase inhibitor	low CCI	0	0
	242565	F	64	0	1	aromatase inhibitor	low CCI	0	0
	242630	F	59	0	1	aromatase inhibitor	low CCI	0	0
	242836	F	56	0	0	aromatase inhibitor	low CCI	0	0
	243138	F	82	0	1	aromatase inhibitor	high CCI	0	0
	243221	F	90	0	0	aromatase inhibitor	high CCI	0	0
	243559	F	54	0	1	tamoxifene	low CCI	0	0
	243751	F	51	0	0	tamoxifene	low CCI	0	0
	243752	F	50	0	0	tamoxifene	low CCI	0	0
	243876	F	67	0	1	aromatase inhibitor	high CCI	0	0
	244112	F	49	0	1	tamoxifene	NA	0	0
	244291	F	45	0	1	tamoxifene	low CCI	0	0
	244449	F	69	0	0	aromatase inhibitor	high CCI	0	0
	244451	F	53	0	0	anti-Her2	low CCI	1	0
	244483	F	52	1	1	aromatase inhibitor	high CCI	0	0
	244610	F	69	0	1	aromatase inhibitor	high CCI	0	0
	245231	F	81	0	1	aromatase inhibitor	high CCI	0	0
	245285	F	73	0	1	tamoxifene	low CCI	0	0
	245766	F	49	0	1	tamoxifene	low CCI	0	0
	245869	F	51	0	1	aromatase inhibitor	low CCI	0	0
	246231	F	62	0	0	aromatase inhibitor	high CCI	0	0
	246311	F	93	0	1	aromatase inhibitor	high CCI	1	0
	246607	F	51	0	0	anti-Her2	low CCI	0	0
	247131	F	52	0	1	aromatase inhibitor	low CCI	0	0
	247714	F	50	0	0	tamoxifene	low CCI	0	0
	248080	F	57	1	1	aromatase inhibitor	high CCI	0	0
	248184	F	74	1	0	aromatase inhibitor	high CCI	0	0
	248396	F	93	0	1	aromatase inhibitor	high CCI	0	0
	248484	F	62	0	1	aromatase inhibitor	high CCI	1	1
	248502	F	55	0	1	aromatase inhibitor	low CCI	0	0
	248653	F	53	0	1	tamoxifene	low CCI	0	0
	249252	F	65	0	0	aromatase inhibitor	high CCI	0	0
	249284	F	60	0	1	aromatase inhibitor	high CCI	0	0
	249529	F	49	0	1	tamoxifene	NA	0	0
	249748	F	49	1	1	aromatase inhibitor	high CCI	0	0
	249766	F	47	0	1	tamoxifene	NA	0	0
	250142	F	63	0	1	aromatase inhibitor	low CCI	0	0
	250307	F	89	0	1	tamoxifene	high CCI	0	0
	250750	F	64	0	1	aromatase inhibitor	low CCI	0	0
	251052	F	81	1	1	aromatase inhibitor	high CCI	0	0
	251255	F	47	0	1	tamoxifene	NA	0	0
	251332	F	53	0	1	tamoxifene	low CCI	0	0
	251494	F	64	0	0	aromatase inhibitor	high CCI	0	0
	251637	F	57	0	1	aromatase inhibitor	low CCI	0	0
	251800	F	86	0	1	aromatase inhibitor	high CCI	0	0
	251853	F	73	0	1	aromatase inhibitor	low CCI	0	0
	251904	F	53	0	1	tamoxifene	low CCI	0	0
	252317	F	72	0	1	aromatase inhibitor	low CCI	0	0
	252760	F	72	0	1	aromatase inhibitor	low CCI	0	0
	252906	M	74	0	1	tamoxifene	high CCI	0	0
	252930	F	63	0	1	aromatase inhibitor	high CCI	0	0
	253097	F	76	0	1	aromatase inhibitor	low CCI	0	0
	253392	F	79	0	1	fulvestrant	low CCI	0	0
	253900	F	86	0	1	aromatase inhibitor	high CCI	0	0
	254027	F	78	0	1	aromatase inhibitor	low CCI	0	0
	254030	F	63	1	1	tamoxifene	high CCI	0	0
	254213	F	44	0	1	tamoxifene	NA	0	0
	254938	F	45	0	1	anti-Her2	low CCI	0	0
	255378	F	70	0	1	aromatase inhibitor	high CCI	0	0
	255427	F	58	0	1	tamoxifene	low CCI	0	0
	256387	F	81	0	1	aromatase inhibitor	high CCI	0	0
	256657	F	68	0	0	aromatase inhibitor	low CCI	0	0
	256697	M	70	0	0	tamoxifene	low CCI	0	0
	256750	F	80	0	1	aromatase inhibitor	high CCI	0	0
	257167	F	79	0	1	aromatase inhibitor	low CCI	0	0
	257463	F	73	1	1	aromatase inhibitor	high CCI	0	0
	257603	F	77	0	1	aromatase inhibitor	high CCI	0	0
	257887	F	44	1	0	aromatase inhibitor	high CCI	0	0
	257983	F	52	0	1	aromatase inhibitor	low CCI	0	0
	258233	F	49	0	1	tamoxifene	NA	0	0
	258435	F	62	1	0	aromatase inhibitor	high CCI	0	0
	258853	F	61	0	0	anti-Her2	low CCI	0	0
	259475	F	64	0	1	aromatase inhibitor	low CCI	0	0
	259574	F	56	0	1	aromatase inhibitor	low CCI	0	0
	259654	F	46	0	0	tamoxifene	NA	0	0
	260009	F	71	0	1	aromatase inhibitor	high CCI	0	0
	260315	F	65	0	1	aromatase inhibitor	high CCI	0	0
	260491	F	64	0	1	aromatase inhibitor	low CCI	0	0
	260994	F	52	0	1	tamoxifene	low CCI	0	0
	261091	F	56	0	1	tamoxifene	low CCI	0	0
	261418	F	90	0	1	tamoxifene	high CCI	0	0
	261530	F	79	0	0	aromatase inhibitor	high CCI	0	0
	261612	F	82	1	1	aromatase inhibitor	high CCI	0	0
	262068	F	77	0	0	aromatase inhibitor	high CCI	0	0
	262305	M	62	0	1	tamoxifene	low CCI	0	0
	262652	F	64	1	1	aromatase inhibitor	high CCI	0	0
	262700	F	74	0	1	aromatase inhibitor	low CCI	0	0
	262956	F	78	0	1	aromatase inhibitor	high CCI	0	0
	263034	F	70	0	1	aromatase inhibitor	high CCI	0	0
	263049	F	69	0	1	aromatase inhibitor	high CCI	0	0
	263761	F	63	0	1	aromatase inhibitor	low CCI	0	0
	264376	F	54	0	1	tamoxifene	low CCI	0	0
	264570	F	66	0	0	aromatase inhibitor	high CCI	0	0
	264648	F	73	0	1	aromatase inhibitor	high CCI	0	0
	265008	F	74	0	1	aromatase inhibitor	high CCI	0	0
	265403	F	86	1	1	aromatase inhibitor	high CCI	0	0
	266255	F	65	1	1	anti-Her2	high CCI	0	0
	266256	F	63	0	0	aromatase inhibitor	high CCI	0	0
	266485	F	81	0	1	aromatase inhibitor	high CCI	0	0
	267256	F	69	0	1	aromatase inhibitor	high CCI	0	0
	267597	F	69	0	1	aromatase inhibitor	low CCI	0	0
	267649	F	66	0	0	aromatase inhibitor	high CCI	0	0
	267850	F	45	0	0	tamoxifene	low CCI	0	0
	268195	F	87	0	1	aromatase inhibitor	high CCI	0	0
	268208	F	79	1	0	aromatase inhibitor	high CCI	0	0
	268258	F	56	1	0	aromatase inhibitor	high CCI	0	0
	268279	F	48	0	0	tamoxifene	low CCI	0	0
	268283	F	47	0	0	tamoxifene	low CCI	0	0
	268489	F	53	0	1	tamoxifene	low CCI	0	0
	268606	F	65	0	1	aromatase inhibitor	low CCI	0	0
	269009	F	47	0	1	tamoxifene	NA	0	0
	269259	F	74	0	1	aromatase inhibitor	low CCI	0	0
	269335	F	56	0	1	aromatase inhibitor	low CCI	0	0
	269528	F	53	1	0	tamoxifene	high CCI	0	0
	269617	F	53	0	1	aromatase inhibitor	low CCI	0	0
	269618	F	53	0	1	aromatase inhibitor	low CCI	0	0
	269696	F	78	0	0	aromatase inhibitor	low CCI	0	0
	269723	F	89	0	1	aromatase inhibitor	high CCI	0	0
	269753	F	56	0	1	aromatase inhibitor	low CCI	0	0
	269777	F	68	0	1	aromatase inhibitor	high CCI	0	0
	269778	F	67	0	1	aromatase inhibitor	high CCI	0	0
	269784	F	62	0	1	aromatase inhibitor	high CCI	0	0
	269991	F	84	0	1	aromatase inhibitor	high CCI	0	0
	270070	F	89	0	1	aromatase inhibitor	high CCI	0	0
	270090	F	74	0	1	aromatase inhibitor	high CCI	0	0
	270190	F	63	0	1	aromatase inhibitor	high CCI	0	0
	270231	F	73	0	1	aromatase inhibitor	high CCI	0	0
	270447	F	66	0	1	aromatase inhibitor	high CCI	0	0
	271004	F	72	0	1	aromatase inhibitor	high CCI	0	0
	271084	F	66	0	0	aromatase inhibitor	high CCI	0	0
	271126	F	62	0	1	tamoxifene	low CCI	0	0
	271133	F	62	0	1	aromatase inhibitor	high CCI	0	0
	271135	F	62	0	1	aromatase inhibitor	high CCI	0	0
	271583	F	47	0	1	aromatase inhibitor	NA	0	0
	271746	F	50	0	1	tamoxifene	low CCI	0	0
	271963	F	66	0	1	aromatase inhibitor	low CCI	0	0
	271981	F	54	0	1	aromatase inhibitor	low CCI	0	0
	272100	F	56	0	0	aromatase inhibitor	low CCI	0	0
	273318	F	57	0	1	tamoxifene	low CCI	0	0
	273539	F	52	0	1	tamoxifene	low CCI	0	0
	273571	F	67	0	1	aromatase inhibitor	low CCI	0	0
	273672	F	74	0	1	tamoxifene	high CCI	0	0
	273710	F	65	0	1	aromatase inhibitor	high CCI	0	0
	273880	F	67	0	1	aromatase inhibitor	high CCI	0	0
	273901	F	61	0	1	aromatase inhibitor	high CCI	0	0
	274028	F	60	0	0	tamoxifene	high CCI	0	0
	274130	F	71	0	1	aromatase inhibitor	high CCI	0	0
	274581	F	90	0	1	aromatase inhibitor	high CCI	0	0
	274768	F	67	0	0	aromatase inhibitor	high CCI	0	0
	274830	F	58	0	1	aromatase inhibitor	low CCI	0	0
	274847	F	56	0	1	tamoxifene	low CCI	0	0
	275309	F	48	0	1	aromatase inhibitor	NA	0	0
	275677	F	44	1	0	aromatase inhibitor	high CCI	0	0
	275777	F	70	1	0	aromatase inhibitor	high CCI	0	0
	275800	F	77	0	1	aromatase inhibitor	low CCI	0	0
	275887	F	83	0	1	aromatase inhibitor	high CCI	0	0
	275901	F	78	0	0	aromatase inhibitor	high CCI	0	0
	275985	M	85	1	1	aromatase inhibitor	high CCI	0	0
	276132	F	84	0	0	aromatase inhibitor	high CCI	0	0
	276294	F	78	0	1	aromatase inhibitor	low CCI	0	0
	276589	F	53	0	1	aromatase inhibitor	low CCI	0	0
	276593	F	53	0	1	tamoxifene	low CCI	0	0
	276649	F	48	0	0	tamoxifene	low CCI	0	0
	276740	F	62	0	1	aromatase inhibitor	low CCI	0	0
	276783	F	64	0	1	aromatase inhibitor	high CCI	0	0
	276847	F	71	0	1	aromatase inhibitor	high CCI	0	0
	276848	F	70	0	1	tamoxifene	low CCI	0	0
	276937	F	85	0	1	aromatase inhibitor	high CCI	0	0
	276942	F	81	1	1	aromatase inhibitor	high CCI	0	0
	276999	F	49	0	1	tamoxifene	NA	0	0
	277278	F	51	0	1	tamoxifene	low CCI	0	0
	277456	F	73	0	1	tamoxifene	low CCI	0	0
	277466	F	52	1	0	aromatase inhibitor	high CCI	0	0
	277701	F	47	0	1	aromatase inhibitor	NA	0	0
	277984	F	38	1	1	aromatase inhibitor	high CCI	0	0
	278295	F	82	0	1	aromatase inhibitor	high CCI	0	0
	278621	M	76	0	0	tamoxifene	low CCI	0	0
	279632	F	47	0	1	tamoxifene	NA	0	0
	279658	F	62	0	1	aromatase inhibitor	low CCI	0	0
	280258	F	62	0	1	aromatase inhibitor	low CCI	0	0
	280567	F	75	0	1	aromatase inhibitor	high CCI	0	0
	280644	F	40	0	0	tamoxifene	low CCI	0	0
	280947	F	72	0	1	aromatase inhibitor	low CCI	0	0
	280985	F	54	0	1	tamoxifene	low CCI	0	0
	281709	F	66	0	1	aromatase inhibitor	high CCI	0	0
	281721	F	64	0	1	aromatase inhibitor	high CCI	0	0
	282327	M	78	1	1	anti-Her2	high CCI	0	0
	282375	F	75	0	1	aromatase inhibitor	high CCI	0	0
	282376	F	74	0	1	aromatase inhibitor	low CCI	0	0
	282594	F	67	0	1	aromatase inhibitor	high CCI	0	0
	282786	F	73	0	1	aromatase inhibitor	high CCI	0	0
	282827	F	62	0	1	aromatase inhibitor	low CCI	0	0
	282878	F	55	0	1	aromatase inhibitor	low CCI	0	0
	283314	F	43	0	1	tamoxifene	low CCI	0	0
	283455	F	45	0	1	tamoxifene	low CCI	0	0
	283708	F	60	0	1	aromatase inhibitor	high CCI	0	0
	283940	F	74	0	0	aromatase inhibitor	high CCI	0	0
	284084	F	82	0	1	aromatase inhibitor	high CCI	0	0
	284421	F	90	0	1	tamoxifene	high CCI	0	0
	284816	F	59	0	1	aromatase inhibitor	low CCI	0	0
	284900	F	63	1	1	aromatase inhibitor	high CCI	0	0
	284958	F	54	0	1	aromatase inhibitor	low CCI	0	0
	285139	F	82	0	1	aromatase inhibitor	high CCI	0	0
	285293	F	67	0	1	aromatase inhibitor	high CCI	0	0
	285299	F	72	0	1	aromatase inhibitor	high CCI	0	0
	285361	F	64	0	1	aromatase inhibitor	high CCI	0	0
	285542	F	74	1	1	aromatase inhibitor	high CCI	0	0
	285648	F	64	0	1	aromatase inhibitor	high CCI	0	0
	285674	F	53	0	0	aromatase inhibitor	low CCI	0	0
	285696	F	87	0	1	tamoxifene	high CCI	0	0
	285714	F	78	0	1	aromatase inhibitor	low CCI	0	0
	285719	F	72	0	1	aromatase inhibitor	high CCI	0	0
	285745	F	50	0	1	aromatase inhibitor	low CCI	0	0
	285853	F	66	0	0	aromatase inhibitor	high CCI	0	0
	286189	F	70	0	1	aromatase inhibitor	low CCI	0	0
	286222	F	58	0	1	aromatase inhibitor	low CCI	0	0
	286349	F	71	0	0	aromatase inhibitor	low CCI	0	0
	286420	F	62	0	0	aromatase inhibitor	low CCI	0	0
	286450	F	47	1	1	aromatase inhibitor	high CCI	0	0
	286528	F	40	0	1	anti-Her2	NA	0	0
	286689	F	64	0	1	aromatase inhibitor	low CCI	0	0
	286737	F	81	1	1	aromatase inhibitor	high CCI	0	0
	286870	F	80	0	1	aromatase inhibitor	high CCI	0	0
	287532	F	57	1	1	aromatase inhibitor	high CCI	0	0
	287533	F	57	0	1	aromatase inhibitor	low CCI	0	0
	287545	F	48	0	0	tamoxifene	low CCI	0	0
	287922	F	65	0	1	aromatase inhibitor	low CCI	0	0
	288029	F	70	0	0	aromatase inhibitor	high CCI	0	0
	288656	F	66	0	1	aromatase inhibitor	low CCI	0	0
	288854	F	76	0	1	aromatase inhibitor	high CCI	0	0
	289643	F	49	1	1	aromatase inhibitor	high CCI	0	0
	290146	F	56	0	1	aromatase inhibitor	low CCI	0	0
	290177	F	51	0	1	aromatase inhibitor	low CCI	0	0
	290436	F	75	0	1	tamoxifene	high CCI	0	0
	290615	F	87	0	0	aromatase inhibitor	high CCI	0	0
	290978	F	47	0	1	tamoxifene	low CCI	0	0
	291178	F	41	0	1	tamoxifene	NA	0	0
	291225	F	68	1	1	aromatase inhibitor	high CCI	0	0
	291234	F	71	0	0	aromatase inhibitor	high CCI	0	0
	291495	F	84	0	0	aromatase inhibitor	high CCI	0	0
	291595	F	49	0	1	tamoxifene	low CCI	0	0
	291732	F	75	0	1	aromatase inhibitor	low CCI	1	0
	291767	F	81	1	1	aromatase inhibitor	high CCI	0	0
	291984	F	68	0	1	aromatase inhibitor	high CCI	0	0
	292132	F	72	1	1	aromatase inhibitor	high CCI	0	0
	292587	F	89	0	1	fulvestrant	high CCI	0	0
	293015	F	77	0	1	aromatase inhibitor	high CCI	0	0
	293105	F	68	0	0	aromatase inhibitor	high CCI	0	0
	293301	F	73	0	1	aromatase inhibitor	low CCI	0	0
	293610	F	72	0	0	aromatase inhibitor	high CCI	0	0
	293787	F	76	0	1	aromatase inhibitor	low CCI	0	0
	293792	F	70	0	1	aromatase inhibitor	high CCI	0	0
	294410	F	68	0	1	tamoxifene	low CCI	0	0
	294647	F	57	0	1	aromatase inhibitor	low CCI	0	0
	294991	F	58	0	1	aromatase inhibitor	low CCI	0	0
	295147	F	77	0	1	aromatase inhibitor	high CCI	0	0
	295181	F	73	0	0	aromatase inhibitor	high CCI	0	0
	295451	F	58	0	1	aromatase inhibitor	low CCI	0	0
	295631	F	81	0	0	aromatase inhibitor	high CCI	0	0
	295749	F	73	0	1	aromatase inhibitor	low CCI	0	0
	295930	F	57	1	1	aromatase inhibitor	high CCI	0	0
	296031	F	46	0	1	aromatase inhibitor	NA	0	0
	296247	F	86	0	1	aromatase inhibitor	high CCI	0	0
	296373	F	78	0	0	aromatase inhibitor	high CCI	0	0
	296382	F	56	0	1	aromatase inhibitor	low CCI	0	0
	296406	F	33	0	1	aromatase inhibitor	low CCI	0	0
	296526	F	88	0	0	aromatase inhibitor	high CCI	0	0
	296659	F	71	0	1	fulvestrant	low CCI	0	0
	296716	F	53	1	1	aromatase inhibitor	high CCI	0	0
	297068	F	72	0	1	aromatase inhibitor	high CCI	0	0
	297246	F	53	0	1	aromatase inhibitor	low CCI	0	0
	297644	F	87	0	1	aromatase inhibitor	high CCI	0	0
	297679	F	59	0	1	aromatase inhibitor	low CCI	0	0
	297693	F	89	0	1	aromatase inhibitor	high CCI	0	0
	297736	F	59	0	1	tamoxifene	low CCI	0	0
	297948	F	87	0	1	aromatase inhibitor	high CCI	0	0
	297996	F	81	1	1	aromatase inhibitor	high CCI	0	0
	298529	F	61	0	1	aromatase inhibitor	low CCI	0	0
	298949	F	85	0	1	aromatase inhibitor	high CCI	0	0
	299012	F	74	0	1	aromatase inhibitor	high CCI	0	0
	299174	F	88	0	1	aromatase inhibitor	high CCI	0	0
	299457	F	55	0	1	tamoxifene	low CCI	0	0
	299539	F	85	0	1	aromatase inhibitor	high CCI	0	0
	299576	F	74	1	1	aromatase inhibitor	high CCI	0	0
	299588	F	67	0	1	aromatase inhibitor	low CCI	0	0
	299597	F	54	0	1	aromatase inhibitor	low CCI	0	0
	299620	F	76	0	1	aromatase inhibitor	high CCI	0	0
	299955	F	39	0	1	tamoxifene	NA	0	0
	300021	F	77	0	1	tamoxifene	low CCI	0	0
	300212	F	71	0	1	aromatase inhibitor	low CCI	0	0
	300280	F	44	0	0	tamoxifene	low CCI	0	0
	300354	F	80	0	1	aromatase inhibitor	high CCI	0	0
	300427	F	53	0	1	tamoxifene	low CCI	0	0
	300463	F	86	1	1	aromatase inhibitor	high CCI	1	1
	300805	F	68	0	1	tamoxifene	low CCI	0	0
	301015	F	81	0	1	aromatase inhibitor	high CCI	0	0
	301075	F	61	0	1	aromatase inhibitor	low CCI	0	0
	301364	F	84	0	1	aromatase inhibitor	high CCI	0	0
	301431	F	81	0	1	aromatase inhibitor	high CCI	0	0
	301557	F	74	0	1	aromatase inhibitor	high CCI	0	0
	301604	F	72	0	1	aromatase inhibitor	low CCI	0	0
	302155	F	80	0	0	aromatase inhibitor	high CCI	0	0
	302821	F	68	0	1	aromatase inhibitor	high CCI	0	0
	303088	M	76	0	0	aromatase inhibitor	low CCI	0	0
	303113	F	73	0	1	aromatase inhibitor	low CCI	0	0
	303130	F	71	0	1	aromatase inhibitor	low CCI	0	0
	303159	F	66	0	1	aromatase inhibitor	low CCI	0	0
	303299	F	72	0	1	aromatase inhibitor	high CCI	0	0
	303806	F	44	0	1	tamoxifene	NA	0	0
	304161	F	52	0	1	aromatase inhibitor	low CCI	0	0
	304273	F	71	0	1	aromatase inhibitor	low CCI	0	0
	304489	F	76	0	1	aromatase inhibitor	low CCI	0	0
	304959	F	69	0	1	aromatase inhibitor	high CCI	0	0
	305282	F	40	0	1	aromatase inhibitor	NA	0	0
	306551	F	83	0	1	aromatase inhibitor	high CCI	0	0
	306573	F	71	0	1	aromatase inhibitor	high CCI	0	0
	306660	F	72	0	0	aromatase inhibitor	high CCI	0	0
	306806	F	78	0	0	aromatase inhibitor	high CCI	0	0
	307253	F	65	0	1	aromatase inhibitor	low CCI	0	0
	307291	F	50	0	1	tamoxifene	low CCI	0	0
	307525	F	87	0	0	aromatase inhibitor	high CCI	0	0
	307573	F	80	0	1	tamoxifene	high CCI	0	0
	309185	F	60	0	1	aromatase inhibitor	low CCI	0	0
	309268	F	72	0	1	aromatase inhibitor	high CCI	0	0
	309286	F	52	0	1	aromatase inhibitor	low CCI	0	0
	309328	F	81	0	1	aromatase inhibitor	high CCI	0	0
	309520	F	77	1	1	aromatase inhibitor	high CCI	0	0
	309589	F	49	0	0	tamoxifene	low CCI	0	0
	309917	F	72	0	1	tamoxifene	low CCI	0	0
	309928	F	45	0	1	tamoxifene	NA	0	0
	310031	F	58	0	1	tamoxifene	low CCI	0	0
	310314	F	83	0	1	fulvestrant	high CCI	0	0
	310898	F	80	0	1	tamoxifene	high CCI	0	0
	311161	F	82	0	1	aromatase inhibitor	high CCI	0	0
	311474	F	71	0	1	aromatase inhibitor	high CCI	0	0
	311652	F	47	0	1	tamoxifene	low CCI	0	0
	312086	F	72	0	1	aromatase inhibitor	high CCI	0	0
	312580	F	59	0	1	tamoxifene	low CCI	0	0
	312703	F	59	0	0	aromatase inhibitor	low CCI	0	0
	312808	F	67	0	1	aromatase inhibitor	high CCI	0	0
	312843	F	79	0	1	aromatase inhibitor	low CCI	0	0
	312865	F	78	0	1	aromatase inhibitor	low CCI	0	0
	312952	F	85	0	1	aromatase inhibitor	high CCI	0	0
	313025	F	73	0	1	aromatase inhibitor	high CCI	0	0
	313479	F	72	1	1	aromatase inhibitor	high CCI	0	0
	313480	F	72	0	1	aromatase inhibitor	low CCI	0	0
	313544	F	70	0	1	tamoxifene	low CCI	0	0
	313958	F	46	0	1	tamoxifene	NA	0	0
	314005	F	73	1	1	aromatase inhibitor	high CCI	0	0
	314018	F	56	0	1	aromatase inhibitor	low CCI	0	0
	314101	F	60	0	1	aromatase inhibitor	low CCI	0	0
	314310	F	83	0	1	aromatase inhibitor	high CCI	0	0
	314936	F	77	0	1	tamoxifene	high CCI	0	0
	314965	F	76	0	1	aromatase inhibitor	high CCI	0	0
	314974	F	76	1	1	aromatase inhibitor	high CCI	0	0
	315344	F	55	0	1	aromatase inhibitor	low CCI	0	0
	316230	F	63	0	1	aromatase inhibitor	low CCI	0	0
	316323	F	46	0	1	tamoxifene	low CCI	0	0
	316457	F	82	0	1	aromatase inhibitor	high CCI	0	0
	316696	F	72	0	1	aromatase inhibitor	low CCI	0	0
	317033	F	71	0	1	tamoxifene	low CCI	0	0
	317512	F	80	0	1	aromatase inhibitor	high CCI	0	0
	317921	F	57	0	1	aromatase inhibitor	low CCI	0	0
	317922	F	53	0	1	aromatase inhibitor	low CCI	0	0
	317999	F	84	0	1	aromatase inhibitor	high CCI	0	0
	318132	F	81	0	1	aromatase inhibitor	high CCI	0	0
	318161	F	64	0	0	aromatase inhibitor	high CCI	0	0
	318191	F	58	0	1	aromatase inhibitor	low CCI	0	0
	318205	F	51	0	1	tamoxifene	low CCI	0	0
	318841	F	78	0	1	aromatase inhibitor	high CCI	0	0
	319070	F	47	1	1	aromatase inhibitor	high CCI	0	0
	319090	F	61	0	1	anti-Her2	high CCI	0	0
	319221	F	93	0	1	aromatase inhibitor	high CCI	0	0
	319238	F	86	1	1	aromatase inhibitor	high CCI	0	0
	319599	F	66	0	1	tamoxifene	low CCI	0	0
	319823	F	81	0	0	aromatase inhibitor	high CCI	0	0
	319833	F	79	0	1	aromatase inhibitor	low CCI	0	0
	319844	F	79	0	0	aromatase inhibitor	high CCI	0	0
	319850	F	77	1	1	aromatase inhibitor	high CCI	0	0
	319927	F	65	0	1	aromatase inhibitor	low CCI	0	0
	319964	F	55	0	1	tamoxifene	low CCI	0	0
	320089	F	61	0	0	tamoxifene	low CCI	0	0
	320310	F	70	0	1	aromatase inhibitor	low CCI	0	0
	320594	F	83	0	0	aromatase inhibitor	high CCI	0	0
	320699	F	71	0	1	aromatase inhibitor	high CCI	0	0
	321004	F	71	0	1	aromatase inhibitor	low CCI	0	0
	321337	F	72	0	1	aromatase inhibitor	low CCI	0	0
	321387	F	67	0	1	aromatase inhibitor	high CCI	0	0
	321418	F	64	0	1	aromatase inhibitor	high CCI	0	0
	321497	F	59	0	0	aromatase inhibitor	low CCI	0	0
	321581	F	54	0	1	tamoxifene	low CCI	0	0
	321885	F	73	0	1	aromatase inhibitor	low CCI	0	0
	322118	F	80	0	1	aromatase inhibitor	high CCI	0	0
	322147	F	75	0	1	aromatase inhibitor	high CCI	0	0
	322187	F	63	0	1	aromatase inhibitor	low CCI	0	0
	322191	F	63	0	1	aromatase inhibitor	low CCI	0	0
	322208	F	61	0	1	aromatase inhibitor	low CCI	0	0
	322212	F	61	1	1	aromatase inhibitor	high CCI	0	0
	322225	F	60	0	1	aromatase inhibitor	low CCI	0	0
	322240	F	58	0	1	aromatase inhibitor	low CCI	0	0
	322408	M	80	0	1	tamoxifene	high CCI	0	0
	322518	F	87	0	1	aromatase inhibitor	high CCI	0	0
	322826	F	81	0	1	aromatase inhibitor	high CCI	0	0
	322908	F	96	0	1	aromatase inhibitor	high CCI	0	0
	323024	F	69	0	1	aromatase inhibitor	high CCI	0	0
	323258	F	71	0	1	aromatase inhibitor	low CCI	0	0
	323380	F	71	0	1	aromatase inhibitor	high CCI	0	0
	323407	F	50	0	1	tamoxifene	low CCI	0	0
	324193	F	73	0	1	aromatase inhibitor	high CCI	0	0
	324393	F	59	0	1	aromatase inhibitor	low CCI	0	0
	324752	F	51	0	1	tamoxifene	low CCI	0	0
	324791	F	88	0	1	aromatase inhibitor	high CCI	0	0
	325063	F	57	1	1	aromatase inhibitor	high CCI	0	0
	325070	F	54	0	1	aromatase inhibitor	low CCI	0	0
	325078	F	51	0	1	tamoxifene	low CCI	0	0
	325128	F	73	1	1	aromatase inhibitor	high CCI	0	0
	325137	F	54	0	1	aromatase inhibitor	low CCI	0	0
	325243	F	72	0	1	aromatase inhibitor	low CCI	0	0
	325248	F	72	0	1	aromatase inhibitor	high CCI	0	0
	325359	F	70	0	1	aromatase inhibitor	high CCI	0	0
	325688	F	44	0	1	aromatase inhibitor	NA	0	0
	326142	F	40	0	0	tamoxifene	low CCI	0	0
	326262	F	54	0	1	aromatase inhibitor	low CCI	0	0
	326302	F	48	0	1	tamoxifene	NA	0	0
	326339	F	46	0	1	tamoxifene	NA	0	0
	326581	F	84	0	1	fulvestrant	high CCI	0	0
	326585	F	74	0	1	aromatase inhibitor	high CCI	0	0
	326691	F	56	0	0	aromatase inhibitor	low CCI	0	0
	327089	F	82	0	1	aromatase inhibitor	high CCI	0	0
	327436	F	78	0	1	fulvestrant	low CCI	0	0
	327472	F	72	1	1	aromatase inhibitor	high CCI	0	0
	327485	F	71	0	1	aromatase inhibitor	high CCI	0	0
	327501	F	67	0	1	aromatase inhibitor	high CCI	0	0
	327513	F	65	1	1	aromatase inhibitor	high CCI	0	0
	327808	F	50	0	1	tamoxifene	low CCI	0	0
	327934	F	72	0	0	aromatase inhibitor	high CCI	0	0
	328289	F	65	0	1	aromatase inhibitor	high CCI	0	0
	328525	F	68	1	1	aromatase inhibitor	high CCI	1	0
	328701	F	48	0	1	aromatase inhibitor	low CCI	0	0
	328771	F	75	0	1	aromatase inhibitor	low CCI	0	0
	328928	F	88	0	0	aromatase inhibitor	high CCI	0	0
	328936	F	82	0	1	aromatase inhibitor	high CCI	0	0
	329168	F	73	0	1	aromatase inhibitor	low CCI	0	0
	329206	F	46	1	0	tamoxifene	high CCI	0	0
	329296	F	88	1	1	aromatase inhibitor	high CCI	0	0
	329344	F	79	0	1	aromatase inhibitor	low CCI	0	0
	329419	F	55	0	1	tamoxifene	low CCI	0	0
	329448	F	68	0	1	aromatase inhibitor	low CCI	0	0
	329651	F	92	0	1	aromatase inhibitor	high CCI	0	0
	330597	F	47	0	1	tamoxifene	low CCI	0	0
	330627	F	75	0	1	aromatase inhibitor	high CCI	0	0
	330682	F	57	0	1	tamoxifene	low CCI	0	0
	331422	F	61	0	1	tamoxifene	high CCI	0	0
	331519	F	87	0	1	aromatase inhibitor	high CCI	0	0
	331782	F	64	0	1	aromatase inhibitor	high CCI	0	0
	331792	F	60	0	1	aromatase inhibitor	low CCI	0	0
	332044	F	60	0	1	tamoxifene	high CCI	0	0
	332047	F	59	0	1	aromatase inhibitor	low CCI	0	0
	332247	F	81	0	0	aromatase inhibitor	high CCI	0	0
	332349	F	85	0	1	aromatase inhibitor	high CCI	0	0
	332417	F	74	0	1	aromatase inhibitor	high CCI	0	0
	332421	F	73	0	1	aromatase inhibitor	low CCI	0	0
	333178	F	67	1	1	fulvestrant	high CCI	0	0
	333202	F	76	1	1	aromatase inhibitor	high CCI	0	0
	334143	F	66	0	1	aromatase inhibitor	high CCI	0	0
	334315	F	59	1	1	aromatase inhibitor	high CCI	0	0
	334342	F	83	0	1	aromatase inhibitor	high CCI	0	0
	334645	F	67	0	1	aromatase inhibitor	low CCI	0	0
	334885	F	57	0	1	aromatase inhibitor	low CCI	0	0
	335352	F	50	0	1	tamoxifene	low CCI	0	0
	335709	F	52	0	1	tamoxifene	low CCI	0	0
	335792	F	63	0	1	aromatase inhibitor	low CCI	0	0
	336213	F	60	0	1	tamoxifene	low CCI	0	0
	336240	F	66	0	1	aromatase inhibitor	low CCI	0	0
	336417	F	49	0	1	tamoxifene	NA	0	0
	336775	F	73	0	0	tamoxifene	high CCI	0	0
	336786	F	72	0	1	aromatase inhibitor	high CCI	0	0
	336856	F	61	0	1	aromatase inhibitor	high CCI	0	0
	337287	F	72	1	0	aromatase inhibitor	high CCI	0	0
	337431	F	48	0	1	aromatase inhibitor	NA	0	0
	337583	F	57	0	1	aromatase inhibitor	low CCI	0	0
	337858	F	50	0	1	aromatase inhibitor	low CCI	0	0
	338083	F	72	0	0	aromatase inhibitor	high CCI	0	0
	338257	F	73	1	1	aromatase inhibitor	high CCI	0	0
	338259	F	56	1	1	anti-Her2	high CCI	0	0
	338285	F	49	0	1	aromatase inhibitor	NA	0	0
	338327	F	69	0	1	aromatase inhibitor	low CCI	0	0
	338596	F	65	0	1	aromatase inhibitor	high CCI	0	0
	339450	F	47	0	0	tamoxifene	NA	0	0
	339611	F	67	0	1	aromatase inhibitor	low CCI	0	0
	339867	F	60	0	1	aromatase inhibitor	low CCI	0	0
	340038	F	50	0	0	tamoxifene	low CCI	0	0
	340108	F	69	0	1	aromatase inhibitor	low CCI	0	0
	340195	F	52	0	0	aromatase inhibitor	low CCI	0	0
	340526	F	49	1	1	aromatase inhibitor	high CCI	0	0
	340597	F	58	0	0	aromatase inhibitor	low CCI	0	0
	340700	F	50	0	1	aromatase inhibitor	low CCI	0	0
	341410	F	59	0	1	aromatase inhibitor	low CCI	0	0
	341467	F	68	0	1	aromatase inhibitor	high CCI	0	0
	341985	F	54	0	1	aromatase inhibitor	low CCI	0	0
	342370	F	65	0	1	aromatase inhibitor	low CCI	0	0
	342517	F	56	0	1	aromatase inhibitor	low CCI	0	0
	342774	F	58	0	1	aromatase inhibitor	low CCI	0	0
	342778	F	57	1	1	aromatase inhibitor	high CCI	0	0
	342892	F	48	0	1	tamoxifene	NA	0	0
	343024	F	71	0	0	aromatase inhibitor	high CCI	0	0
	343197	F	85	1	0	aromatase inhibitor	high CCI	0	0
	343232	F	49	1	1	aromatase inhibitor	high CCI	0	0
	344187	F	47	0	1	aromatase inhibitor	NA	0	0
	344542	F	57	0	1	aromatase inhibitor	low CCI	0	0
	344895	F	75	0	1	aromatase inhibitor	high CCI	0	0
	344992	F	93	0	0	aromatase inhibitor	high CCI	0	0
	345111	F	72	1	1	fulvestrant	high CCI	0	0
	345176	F	63	0	1	aromatase inhibitor	high CCI	0	0
	345269	F	43	0	1	tamoxifene	NA	0	0
	345487	F	80	0	0	aromatase inhibitor	high CCI	0	0
	345545	F	73	1	1	aromatase inhibitor	high CCI	0	0
	345578	F	70	0	1	aromatase inhibitor	low CCI	0	0
	345628	F	64	0	0	aromatase inhibitor	high CCI	0	0
	345761	F	99	1	1	aromatase inhibitor	high CCI	0	0
	345807	F	81	0	1	aromatase inhibitor	high CCI	0	0
	346409	F	84	1	1	fulvestrant	high CCI	0	0
	346418	F	55	0	1	aromatase inhibitor	low CCI	0	0
	346505	F	79	0	1	tamoxifene	low CCI	0	0
	346562	F	45	0	1	tamoxifene	low CCI	0	0
	346616	F	78	0	1	aromatase inhibitor	low CCI	0	0
	347511	F	64	0	1	aromatase inhibitor	high CCI	0	0
	347575	F	58	0	1	tamoxifene	low CCI	0	0
	348101	F	63	1	1	aromatase inhibitor	high CCI	0	0
	348223	F	45	0	1	aromatase inhibitor	high CCI	0	0
	348302	F	86	1	1	aromatase inhibitor	high CCI	0	0
	348396	F	62	0	1	aromatase inhibitor	low CCI	0	0
	348483	F	70	0	1	aromatase inhibitor	low CCI	0	0
	348484	F	69	1	1	aromatase inhibitor	high CCI	0	0
	348515	F	54	0	0	tamoxifene	low CCI	0	0
	348519	F	54	0	1	aromatase inhibitor	low CCI	0	0
	348864	F	79	0	1	aromatase inhibitor	low CCI	0	0
	350143	F	47	0	1	tamoxifene	low CCI	0	0
	350851	F	46	0	1	tamoxifene	low CCI	0	0
	351686	F	77	0	1	tamoxifene	low CCI	0	0
	352387	F	76	1	1	aromatase inhibitor	high CCI	0	0
	352891	F	75	0	1	aromatase inhibitor	low CCI	0	0
	352917	F	70	0	1	aromatase inhibitor	low CCI	0	0
	353135	F	76	0	1	aromatase inhibitor	high CCI	0	0
	353718	F	83	0	1	aromatase inhibitor	high CCI	0	0
	353761	F	81	0	1	aromatase inhibitor	high CCI	0	0
	353917	F	72	0	1	aromatase inhibitor	high CCI	0	0
	354031	F	65	0	1	aromatase inhibitor	high CCI	0	0
	354100	F	60	0	1	aromatase inhibitor	low CCI	0	0
	354164	F	56	0	0	tamoxifene	low CCI	0	0
	354790	F	79	0	0	aromatase inhibitor	high CCI	0	0
	355874	F	54	0	1	tamoxifene	low CCI	0	0
	356031	F	48	0	1	aromatase inhibitor	NA	0	0
	356418	F	74	0	1	aromatase inhibitor	high CCI	0	0
	356465	F	56	0	1	aromatase inhibitor	low CCI	0	0
	356664	F	46	0	1	aromatase inhibitor	low CCI	0	0
	356893	F	73	0	1	aromatase inhibitor	low CCI	0	0
	357178	F	52	1	0	aromatase inhibitor	high CCI	0	0
	357254	F	85	0	0	aromatase inhibitor	high CCI	0	0
	357313	F	78	0	1	aromatase inhibitor	high CCI	0	0
	357701	F	66	1	1	aromatase inhibitor	high CCI	0	0
	358285	F	92	0	1	aromatase inhibitor	high CCI	0	0
	358289	F	89	0	1	aromatase inhibitor	high CCI	0	0
	358803	F	89	0	1	aromatase inhibitor	high CCI	0	0
	359075	F	83	0	1	aromatase inhibitor	high CCI	0	0
	359085	F	62	0	1	aromatase inhibitor	low CCI	0	0
	359151	F	80	0	0	aromatase inhibitor	high CCI	0	0
	359193	F	53	0	1	aromatase inhibitor	low CCI	0	0
	359647	F	43	0	1	aromatase inhibitor	NA	0	0
	359861	F	72	0	1	aromatase inhibitor	high CCI	0	0
	359870	F	70	0	1	aromatase inhibitor	high CCI	0	0
	360153	F	75	0	0	aromatase inhibitor	high CCI	0	0
	360461	F	65	0	1	aromatase inhibitor	high CCI	0	0
	360511	F	53	0	1	aromatase inhibitor	low CCI	0	0
	360592	F	41	0	1	aromatase inhibitor	low CCI	0	0
	360892	F	37	0	1	tamoxifene	NA	0	0
	360964	F	60	0	1	aromatase inhibitor	low CCI	0	0
	361565	F	42	0	1	tamoxifene	NA	0	0
	361854	F	61	0	1	aromatase inhibitor	high CCI	0	0
	361877	F	56	0	1	tamoxifene	low CCI	0	0
	361943	F	52	0	1	tamoxifene	low CCI	0	0
	362523	F	69	1	1	aromatase inhibitor	high CCI	0	0
	362597	F	72	0	1	aromatase inhibitor	high CCI	0	0
	362793	F	72	0	1	aromatase inhibitor	high CCI	0	0
	363185	F	65	0	1	aromatase inhibitor	high CCI	0	0
	363246	F	57	0	1	aromatase inhibitor	low CCI	0	0
	363349	F	75	0	1	aromatase inhibitor	low CCI	0	0
	363427	F	48	1	1	aromatase inhibitor	high CCI	0	0
	363585	F	63	0	1	aromatase inhibitor	low CCI	0	0
	364353	F	71	0	1	aromatase inhibitor	high CCI	0	0
	364364	F	67	0	1	aromatase inhibitor	low CCI	0	0
	364543	F	71	0	0	aromatase inhibitor	high CCI	0	0
	364608	F	59	0	1	aromatase inhibitor	low CCI	0	0
	364653	F	90	0	0	aromatase inhibitor	high CCI	0	0
	364721	F	58	0	0	aromatase inhibitor	low CCI	0	0
	364775	F	53	0	1	tamoxifene	low CCI	0	0
	364797	F	53	0	0	aromatase inhibitor	low CCI	0	0
	365159	F	49	0	0	tamoxifene	low CCI	1	0
	365814	F	89	0	1	aromatase inhibitor	high CCI	0	0
	366015	F	81	0	1	aromatase inhibitor	high CCI	0	0
	366088	F	78	0	0	aromatase inhibitor	high CCI	0	0
	366094	F	78	0	1	aromatase inhibitor	low CCI	0	0
	366191	F	74	0	1	aromatase inhibitor	high CCI	0	0
	366307	F	69	0	1	aromatase inhibitor	low CCI	0	0
	366345	F	68	0	0	fulvestrant	high CCI	0	0
	366585	F	57	0	0	aromatase inhibitor	low CCI	0	0
	366635	F	53	0	1	aromatase inhibitor	low CCI	0	0
	366720	F	43	0	1	tamoxifene	low CCI	0	0
	367662	F	64	0	0	tamoxifene	high CCI	0	0
	367839	F	74	0	0	tamoxifene	high CCI	0	0
	367917	F	84	0	0	aromatase inhibitor	high CCI	0	0
	367955	F	78	0	1	aromatase inhibitor	high CCI	0	0
	367989	F	72	0	1	tamoxifene	high CCI	0	0
	367992	F	72	0	0	aromatase inhibitor	high CCI	0	0
	368012	F	69	0	1	aromatase inhibitor	low CCI	0	0
	368261	F	55	0	1	aromatase inhibitor	low CCI	0	0
	368316	F	59	0	1	aromatase inhibitor	low CCI	0	0
	368507	M	56	0	1	tamoxifene	low CCI	0	0
	368662	F	81	0	1	aromatase inhibitor	high CCI	0	0
	369080	F	68	1	1	aromatase inhibitor	high CCI	0	0
	369277	F	74	0	1	aromatase inhibitor	high CCI	0	0
	369279	F	72	0	1	aromatase inhibitor	high CCI	0	0
	370029	F	75	0	1	aromatase inhibitor	high CCI	0	0
	370062	F	66	0	0	aromatase inhibitor	high CCI	0	0
	370121	F	72	0	1	tamoxifene	low CCI	0	0
	371056	F	51	0	1	tamoxifene	low CCI	0	0
	371399	F	62	1	1	aromatase inhibitor	high CCI	0	0
	371484	F	47	1	1	aromatase inhibitor	high CCI	0	0
	371487	F	47	0	1	aromatase inhibitor	low CCI	0	0
	371494	F	44	0	1	aromatase inhibitor	low CCI	0	0
	371647	F	88	0	1	aromatase inhibitor	high CCI	0	0
	371669	F	86	0	1	aromatase inhibitor	high CCI	0	0
	371696	F	81	0	1	aromatase inhibitor	high CCI	0	0
	371722	F	76	0	1	aromatase inhibitor	high CCI	0	0
	371807	F	65	1	1	aromatase inhibitor	high CCI	0	0
	371811	F	63	0	0	tamoxifene	low CCI	0	0
	371825	F	60	0	1	aromatase inhibitor	high CCI	0	0
	372063	F	80	0	1	aromatase inhibitor	high CCI	0	0
	372186	F	68	0	1	aromatase inhibitor	low CCI	0	0
	372209	F	63	0	1	aromatase inhibitor	low CCI	0	0
	372246	F	53	0	1	aromatase inhibitor	low CCI	0	0
	372248	F	53	0	1	aromatase inhibitor	low CCI	0	0
	372376	F	69	0	0	aromatase inhibitor	high CCI	0	0
	372405	F	60	0	1	aromatase inhibitor	low CCI	0	0
	372416	F	59	1	1	aromatase inhibitor	high CCI	0	0
	373076	F	53	0	1	aromatase inhibitor	low CCI	0	0
	373404	F	70	0	1	aromatase inhibitor	high CCI	0	0
	373582	F	56	0	0	aromatase inhibitor	low CCI	0	0
	374107	F	63	0	1	tamoxifene	high CCI	0	0
	374195	F	57	0	1	aromatase inhibitor	low CCI	0	0
	374408	F	47	0	1	tamoxifene	low CCI	0	0
	375035	F	64	1	1	aromatase inhibitor	high CCI	1	0
	375079	F	60	0	1	tamoxifene	low CCI	0	0
	375214	F	47	0	0	aromatase inhibitor	low CCI	0	0
	375252	F	73	0	1	aromatase inhibitor	high CCI	0	0
	375338	M	75	0	1	tamoxifene	high CCI	0	0
	375833	F	76	0	1	aromatase inhibitor	low CCI	0	0
	375925	F	46	0	1	aromatase inhibitor	low CCI	0	0
	376187	M	46	0	0	tamoxifene	NA	0	0
	376205	F	86	0	0	aromatase inhibitor	high CCI	0	0
	376231	F	68	0	1	aromatase inhibitor	high CCI	0	0
	376233	F	66	0	1	aromatase inhibitor	high CCI	0	0
	376257	F	58	0	0	aromatase inhibitor	low CCI	0	0
	376845	F	93	0	1	aromatase inhibitor	high CCI	0	0
	376894	F	82	0	1	aromatase inhibitor	high CCI	0	0
	377073	F	77	0	1	aromatase inhibitor	high CCI	0	0
	377801	F	62	0	1	tamoxifene	low CCI	0	0
	378104	F	48	0	1	aromatase inhibitor	low CCI	0	0
	378296	F	70	0	1	aromatase inhibitor	high CCI	0	0
	378300	F	66	0	1	tamoxifene	low CCI	0	0
	378322	F	59	0	1	tamoxifene	low CCI	0	0
	378336	F	52	0	1	tamoxifene	low CCI	0	0
	378413	F	62	0	1	aromatase inhibitor	low CCI	0	0
	378519	F	56	0	0	tamoxifene	low CCI	0	0
	378523	F	49	0	1	aromatase inhibitor	NA	0	0
	378699	F	63	0	1	aromatase inhibitor	low CCI	0	0
	378713	F	60	0	0	aromatase inhibitor	high CCI	0	0
	378752	F	51	0	0	tamoxifene	low CCI	0	0
	378957	M	83	0	0	aromatase inhibitor	high CCI	0	0
	378967	F	73	0	1	aromatase inhibitor	low CCI	0	0
	379137	F	64	0	1	aromatase inhibitor	low CCI	0	0
	379221	F	57	0	1	aromatase inhibitor	low CCI	0	0
	379735	F	67	1	0	aromatase inhibitor	high CCI	0	0
	379952	F	50	0	0	tamoxifene	low CCI	0	0
	380542	F	65	0	1	aromatase inhibitor	low CCI	0	0
	380731	F	54	0	0	tamoxifene	low CCI	0	0
	380758	F	44	1	1	aromatase inhibitor	high CCI	0	0
	381324	F	82	0	1	aromatase inhibitor	high CCI	0	0
	382200	F	71	0	1	aromatase inhibitor	high CCI	0	0
	382258	F	96	0	1	aromatase inhibitor	high CCI	0	0
	382544	F	68	0	1	aromatase inhibitor	low CCI	0	0
	382565	F	63	1	1	aromatase inhibitor	high CCI	0	0
	382570	F	63	0	1	aromatase inhibitor	low CCI	0	0
	382780	F	58	0	1	aromatase inhibitor	low CCI	0	0
	382888	F	70	1	1	tamoxifene	high CCI	0	0
	382930	F	95	0	0	aromatase inhibitor	high CCI	0	0
	383094	F	66	0	0	aromatase inhibitor	high CCI	0	0
	383095	F	66	0	0	aromatase inhibitor	low CCI	0	0
	383151	F	73	0	0	aromatase inhibitor	high CCI	0	0
	383460	M	58	0	0	aromatase inhibitor	low CCI	0	0
	383692	F	46	0	1	tamoxifene	NA	0	0
	383858	F	82	0	1	aromatase inhibitor	high CCI	0	0
	383870	F	55	0	1	aromatase inhibitor	low CCI	0	0
	383882	F	72	0	1	tamoxifene	high CCI	0	0
	384446	F	85	0	0	aromatase inhibitor	high CCI	0	0
	384479	F	73	0	1	aromatase inhibitor	low CCI	0	0
	384873	F	59	0	1	aromatase inhibitor	low CCI	0	0
	385097	F	56	0	0	aromatase inhibitor	low CCI	0	0
	385124	F	57	0	1	aromatase inhibitor	low CCI	0	0
	385168	F	53	0	1	aromatase inhibitor	low CCI	0	0
	385588	F	72	0	1	anti-Her2	high CCI	0	0
	385603	F	60	0	0	aromatase inhibitor	high CCI	0	0
	385673	F	56	0	1	aromatase inhibitor	low CCI	0	0
	385838	F	52	1	1	aromatase inhibitor	high CCI	0	0
	386001	F	61	0	0	aromatase inhibitor	low CCI	0	0
	386125	F	74	0	1	aromatase inhibitor	high CCI	0	0
	386446	F	95	0	1	aromatase inhibitor	high CCI	0	0
	386701	F	71	0	0	aromatase inhibitor	high CCI	0	0
	386833	M	29	0	0	tamoxifene	NA	0	0
	386980	F	52	0	1	aromatase inhibitor	low CCI	0	0
	387109	F	54	1	1	aromatase inhibitor	high CCI	0	0
	387132	F	78	1	0	aromatase inhibitor	high CCI	0	0
	387191	F	84	0	1	aromatase inhibitor	high CCI	0	0
	387303	F	62	0	0	aromatase inhibitor	high CCI	0	0
	387365	F	62	0	1	aromatase inhibitor	low CCI	0	0
	387387	F	71	0	1	tamoxifene	low CCI	0	0
	387597	F	60	0	1	aromatase inhibitor	high CCI	0	0
	387669	F	35	1	1	tamoxifene	high CCI	0	0
	387691	F	85	0	1	aromatase inhibitor	high CCI	0	0
	388068	F	81	0	1	aromatase inhibitor	high CCI	0	0
	388084	F	46	0	0	tamoxifene	low CCI	0	0
	388188	F	81	0	0	aromatase inhibitor	high CCI	0	0
	388328	F	64	0	1	aromatase inhibitor	high CCI	0	0
	388354	F	62	0	1	aromatase inhibitor	low CCI	0	0
	388373	F	73	0	1	aromatase inhibitor	high CCI	0	0
	388422	F	50	0	1	tamoxifene	low CCI	0	0
	388444	F	75	0	1	aromatase inhibitor	low CCI	0	0
	388542	F	98	0	1	aromatase inhibitor	high CCI	0	0
	388820	F	56	0	1	aromatase inhibitor	low CCI	0	0
	388853	F	66	0	1	aromatase inhibitor	high CCI	0	0
	389293	F	89	0	1	aromatase inhibitor	high CCI	0	0
	389306	F	75	0	1	aromatase inhibitor	high CCI	0	0
	389382	F	80	0	1	aromatase inhibitor	high CCI	0	0
	389519	F	56	1	1	aromatase inhibitor	high CCI	0	0
	389553	F	83	0	1	aromatase inhibitor	high CCI	0	0
	389560	F	62	0	1	aromatase inhibitor	low CCI	0	0
	389680	F	82	0	0	aromatase inhibitor	high CCI	0	0
	389682	F	60	1	1	aromatase inhibitor	high CCI	0	0
	389906	F	48	0	1	aromatase inhibitor	low CCI	0	0
	390427	F	53	0	1	aromatase inhibitor	low CCI	0	0
	390854	F	56	0	1	aromatase inhibitor	low CCI	0	0
	391199	F	60	0	1	aromatase inhibitor	low CCI	0	0
	391264	F	60	0	1	aromatase inhibitor	high CCI	0	0
	391268	F	71	1	1	aromatase inhibitor	high CCI	0	0
	391274	F	56	0	1	aromatase inhibitor	low CCI	0	0
	391491	F	51	0	0	aromatase inhibitor	low CCI	0	0
	391504	F	48	0	1	tamoxifene	low CCI	0	0
	391759	F	81	0	1	aromatase inhibitor	high CCI	0	0
	391786	F	74	0	1	aromatase inhibitor	low CCI	0	0
	391962	F	66	0	1	tamoxifene	high CCI	0	0
	392062	F	43	0	1	aromatase inhibitor	NA	0	0
	392153	F	50	0	1	aromatase inhibitor	low CCI	0	0
	392693	F	48	0	1	tamoxifene	NA	0	0
	392711	F	81	1	1	aromatase inhibitor	high CCI	1	1
	392713	F	78	1	1	aromatase inhibitor	high CCI	0	0
	392751	F	46	0	1	tamoxifene	low CCI	0	0
	393103	F	72	0	0	aromatase inhibitor	high CCI	0	0
	393244	F	79	0	0	aromatase inhibitor	high CCI	0	0
	393292	F	69	0	1	aromatase inhibitor	low CCI	0	0
	393703	F	80	1	1	aromatase inhibitor	high CCI	0	0
	393747	F	74	0	1	aromatase inhibitor	low CCI	0	0
	393813	F	61	0	1	aromatase inhibitor	low CCI	0	0
	394663	F	81	0	1	aromatase inhibitor	high CCI	0	0
	394811	F	72	0	1	tamoxifene	low CCI	0	0
	394909	F	61	0	1	anti-Her2	high CCI	0	0
	395091	F	81	0	0	aromatase inhibitor	high CCI	0	0
	395189	F	62	0	1	aromatase inhibitor	high CCI	0	0
	395238	F	50	0	1	aromatase inhibitor	low CCI	0	0
	395910	F	88	0	0	aromatase inhibitor	high CCI	0	0
	395971	F	65	0	1	aromatase inhibitor	high CCI	0	0
	395986	F	60	0	1	aromatase inhibitor	low CCI	0	0
	396364	F	79	0	1	aromatase inhibitor	high CCI	0	0
	396937	F	91	0	1	aromatase inhibitor	high CCI	0	0
	397040	F	51	0	1	tamoxifene	low CCI	0	0
	397042	F	51	0	1	aromatase inhibitor	low CCI	0	0
	397233	F	60	1	1	aromatase inhibitor	high CCI	0	0
	397403	F	81	0	1	aromatase inhibitor	high CCI	0	0
	397450	F	52	0	1	aromatase inhibitor	low CCI	0	0
	397526	F	70	0	1	tamoxifene	high CCI	0	0
	397583	F	64	0	1	aromatase inhibitor	low CCI	0	0
	397907	F	51	1	1	tamoxifene	high CCI	0	0
	398101	F	75	0	0	aromatase inhibitor	high CCI	0	0
	398309	F	46	0	1	tamoxifene	low CCI	0	0
[truncated: 20,988 more rows]

## Sheet: Supp. Table S2
Supp. Table S2	Residents in Emilia-Romagna Region by age groups and gender
Table S2. Distribution of the resident population in the Emilia-Romagna Region, Italy, in 2020, stratified by age group and gender. Age groups are expressed in completed years; 90+ denotes individuals aged 90 years or older. Data are presented as absolute counts.	Age groups	Residents 2020 Males	Residents 2020 Females	Total
	0-9	189456	178967	368423
	10-19	212636	197801	410437
	20-29	220187	202600	422787
	30-39	253044	252168	505212
	40-49	347504	348599	696103
	50-59	347620	357381	705001
	60-69	257377	284733	542110
	70-79	209710	246202	455912
	80-89	120243	176499	296742
	90+	19956	51609	71565
	Total	2177733	2296559	4474292
